# Supplementary material for: d-Xylonic acid: a solvent and an effective biocatalyst for a three-component reaction
Source: Royal Society of Chemistry journal article supplement (doi:10.1039/c5gc01727k), 2015-11-03
Supplement: c5gc01727k1.pdf [file c5gc01727k1.pdf]

1 *Supplementary Information for*  
2 **D-xylonic Acid: A Solvent and Effective Biocatalyst for Three-component**  
3 **Reaction**

4  
5 Jiliang Ma,<sup>a</sup> Linxin Zhong,<sup>a</sup> Xinwen Peng,<sup>a,\*</sup> Runcang Sun,<sup>b,\*</sup>

6  
7 <sup>a</sup>State Key Laboratory of Pulp and Paper Engineering, South China University of  
8 Technology, Guangzhou, China.

9 <sup>b</sup>Beijing Key Laboratory of Lignocellulosic Chemistry, Beijing Forestry University,  
10 Beijing, China.

11 \*Corresponding authors' E-mail: fexwpeng@scut.edu.cn (Xinwen Peng), Tel.: +86-  
12 020-87111860; Fax: +86-020-871118 60.

13  
14

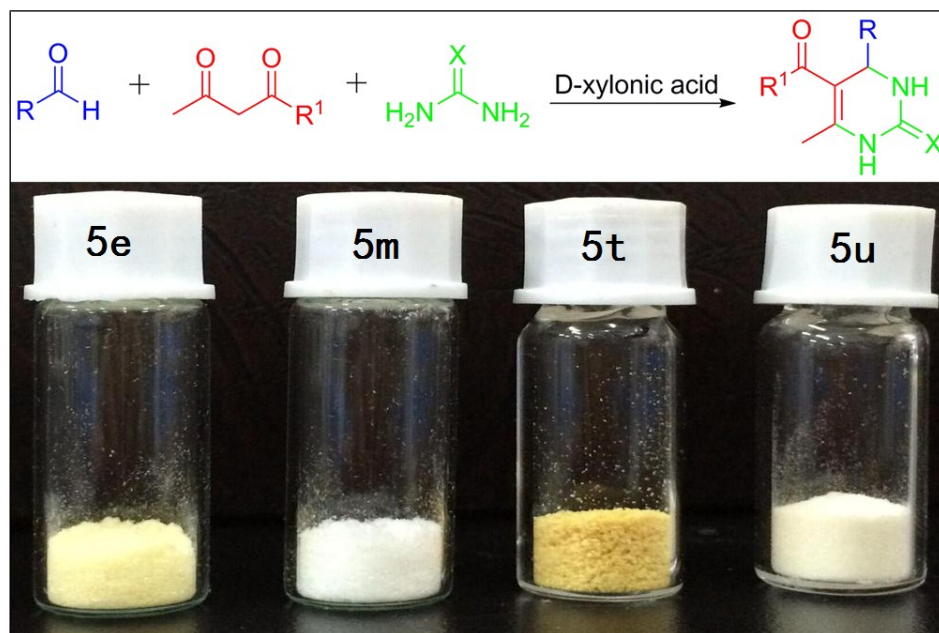

15  
16  
17  
18  
19

20 **Summary**

|    |                                            |             |
|----|--------------------------------------------|-------------|
| 21 | Scheme S1-----                             | Page 3      |
| 22 | Scheme S2-----                             | Page 4      |
| 23 | Scheme S3-----                             | Page 5      |
| 24 | Scheme S4-----                             | Page 6      |
| 25 | Scheme S5-----                             | Page 7      |
| 26 | Scheme S6-----                             | Page 8      |
| 27 | <sup>1</sup> H NMR for all compounds-----  | Page 9-23   |
| 28 | <sup>13</sup> C NMR for all compounds----- | Page 24-38  |
| 29 | 2D NMR of 5v-5z-----                       | Page 39-41  |
| 30 | Spectroscopic data for all compounds ----- | Pages 42-48 |

31  
32  
33  
34  
35  
36  
37  
38  
39  
40  
41  
42  
43  
44  
45  
46  
47  
48  
49  
50  
51  
52  
53  
54  
55  
56  
57

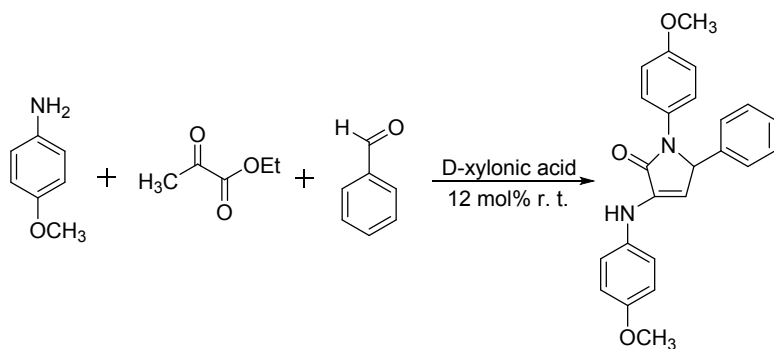

58

59 **Scheme S1** D-xylonic acid catalyzed for the synthesis of 5-phenyl-1(4-  
 60 methoxyphenyl)-3[(4-methoxyphenyl)-amino]-1*H*-pyrrol-2(5*H*)-one.

61

62

63

64

65

66

67

68

69

70

71

72

73

74

75

76

77

78

79

80

81

82

83

84

85

86

87

88

89

90

91

92

93

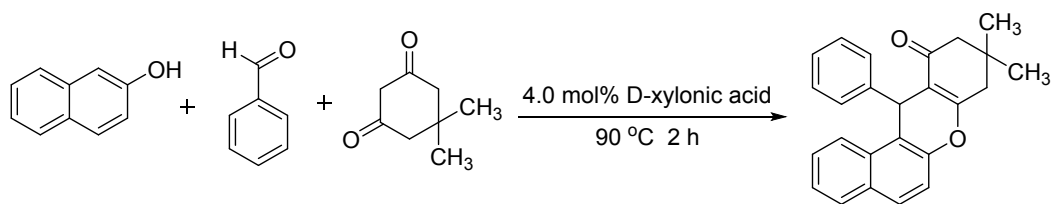

94

95 **Scheme S2** D-xylonic acid catalyzed for the synthesis of 12-phenyl-9,9-dimethyl-  
96 8,9,10,12-tetrahydrobenzo[*a*]xanthen-11-one.

97

98

99

100

101

102

103

104

105

106

107

108

109

110

111

112

113

114

115

116

117

118

119

120

121

122

123

124

125

126

127

128

129

130

131

132



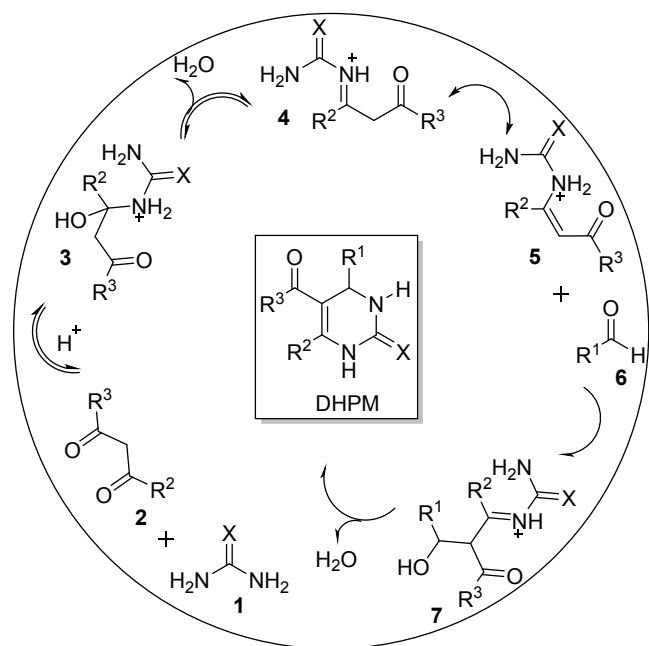

162

163 **Scheme S4** The enamine-based mechanism for the Biginelli reaction.

164

165

166

167

168

169

170

171

172

173

174

175

176

177

178

179

180

181

182

183

184

185

186

187

188

189

190

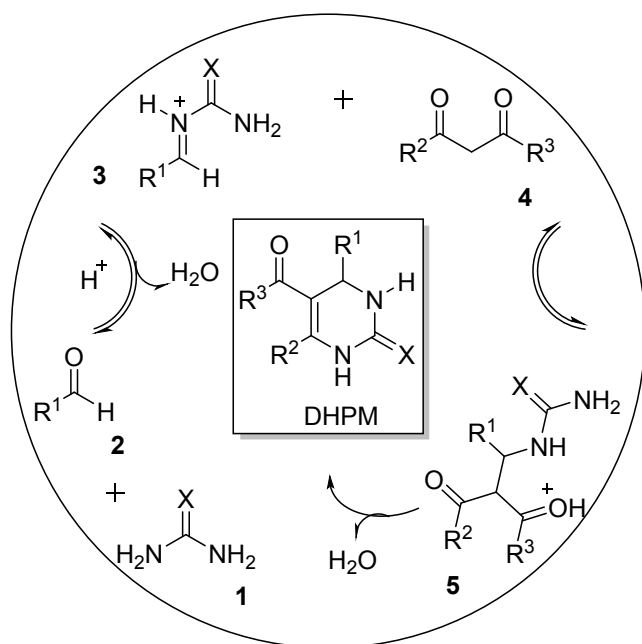

191

192 **Scheme S5** The iminium mechanism for the Biginelli reaction .

193

194

195

196

197

198

199

200

201

202

203

204

205

206

207

208

209

210

211

212

213

214

215

216

217

218

219

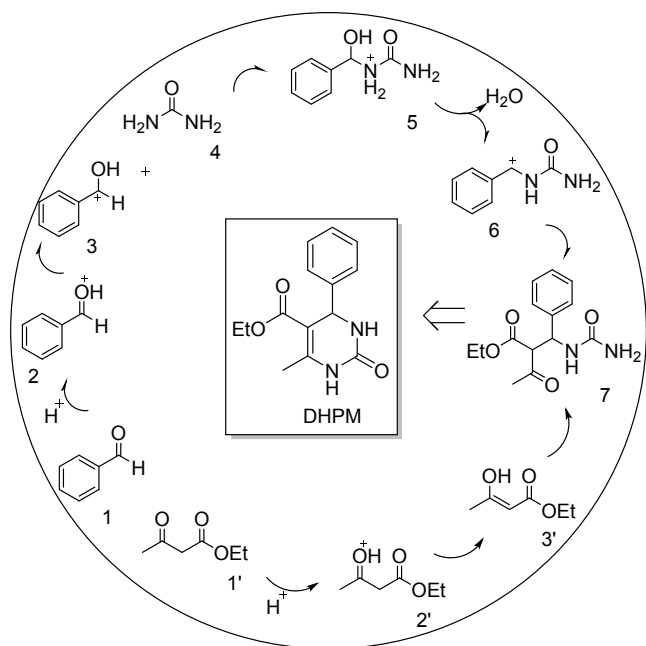

220

221 **Scheme S6** A plausible mechanism of D-xylic acid-catalyzed  
 222 three-component Biginelli condensation reaction .

223

224

225

226

227

228

229

230

231

232

233

234

235

236

237

238

239

240

241

242

243

244

245

246

247

248



249 <sup>1</sup>H NMR for all compounds

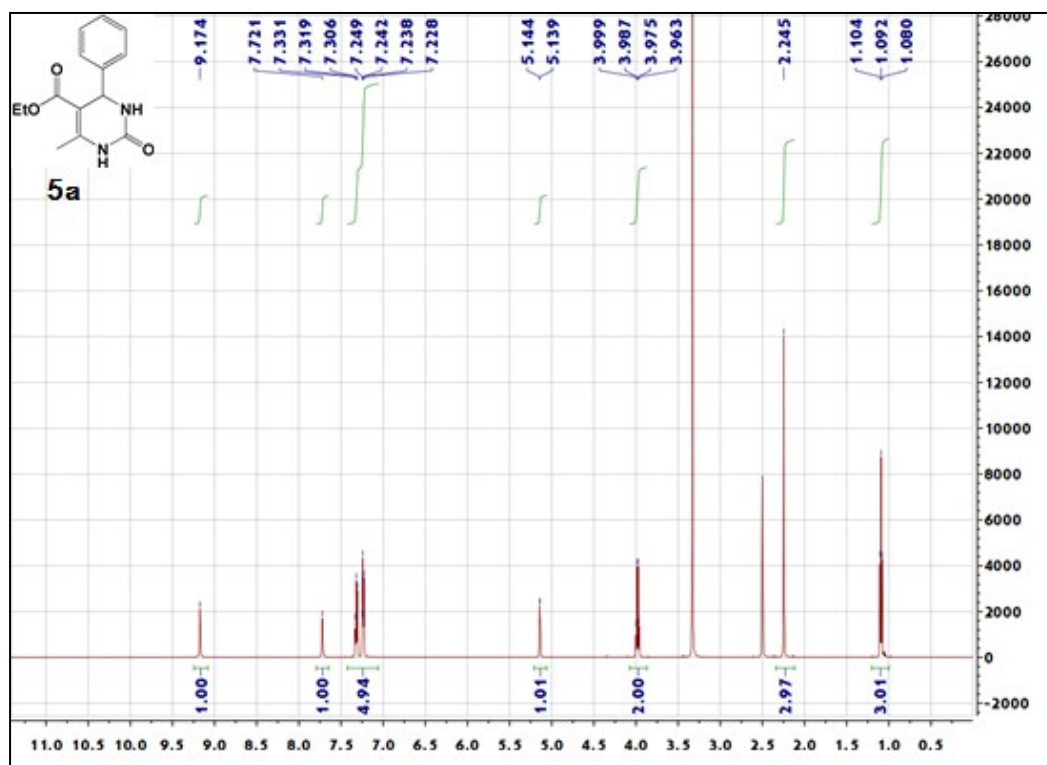

250

251

252

253

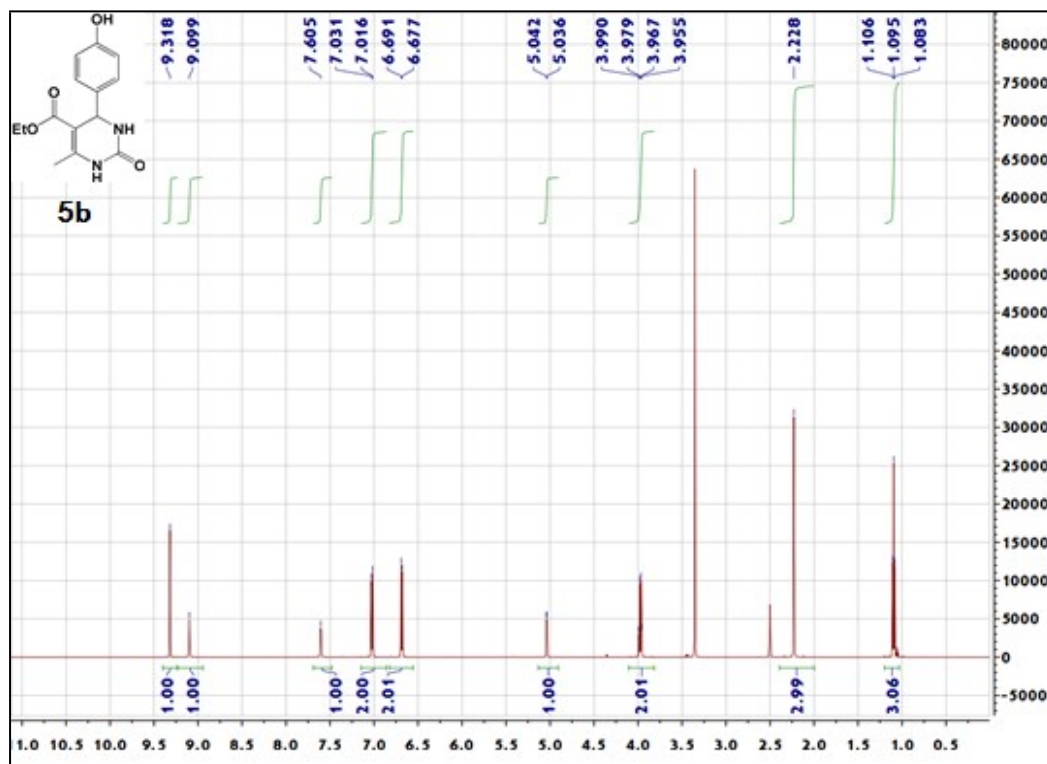

254

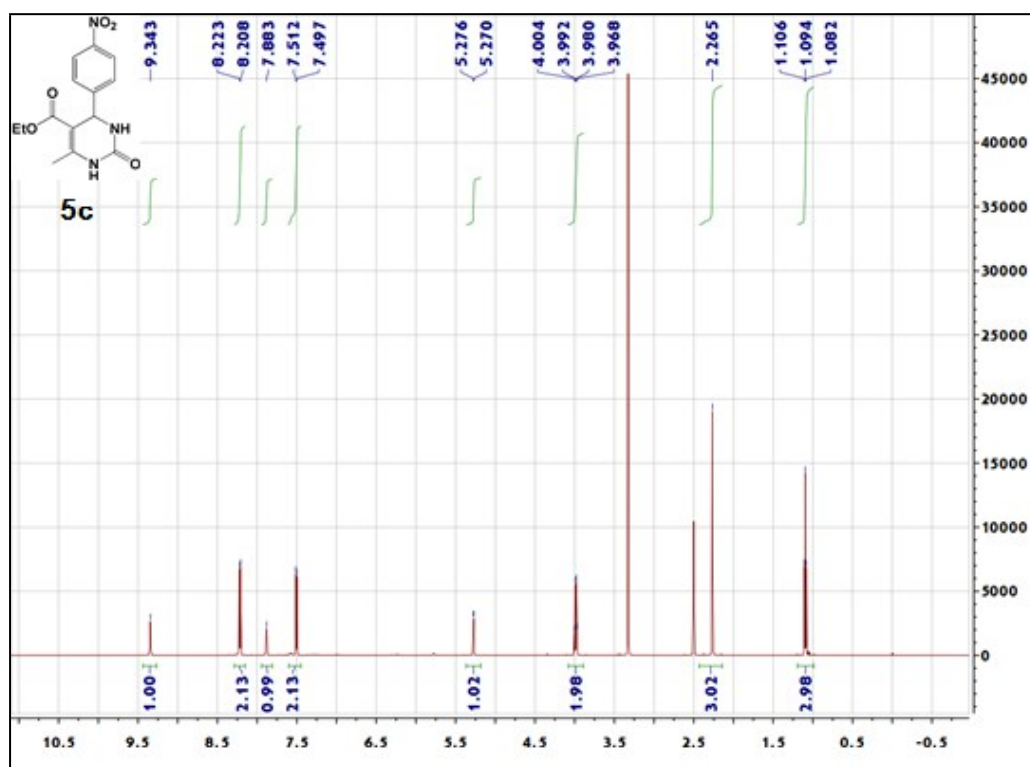

255

256

257

258

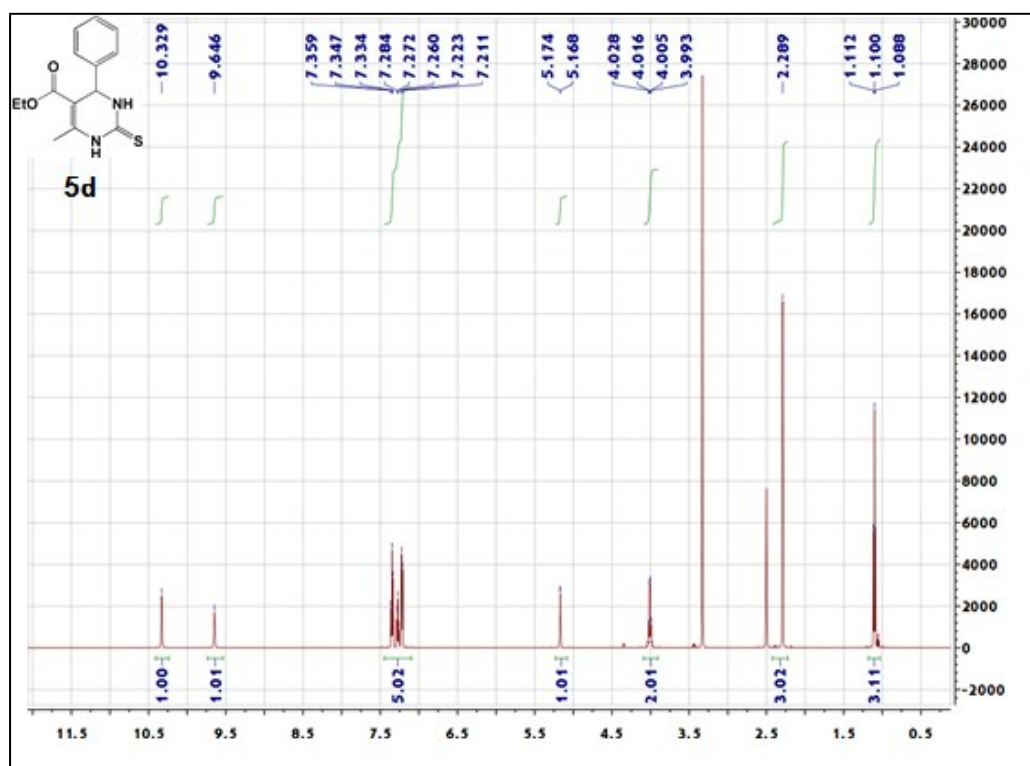

259

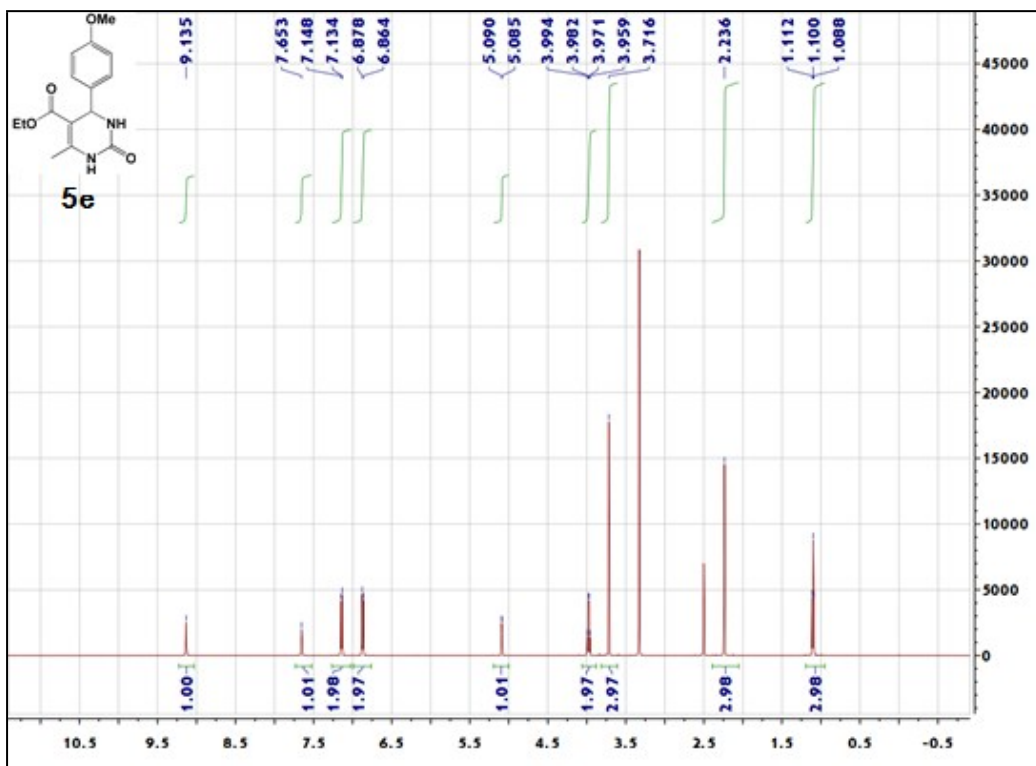

260

261

262

263

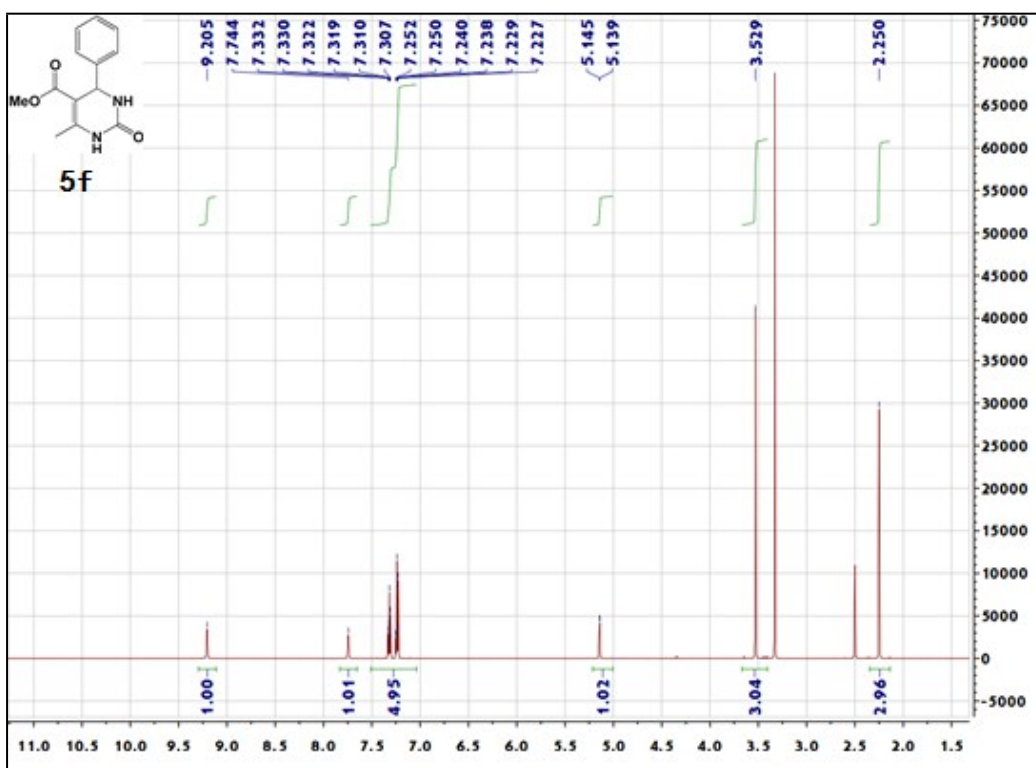

264

265

266

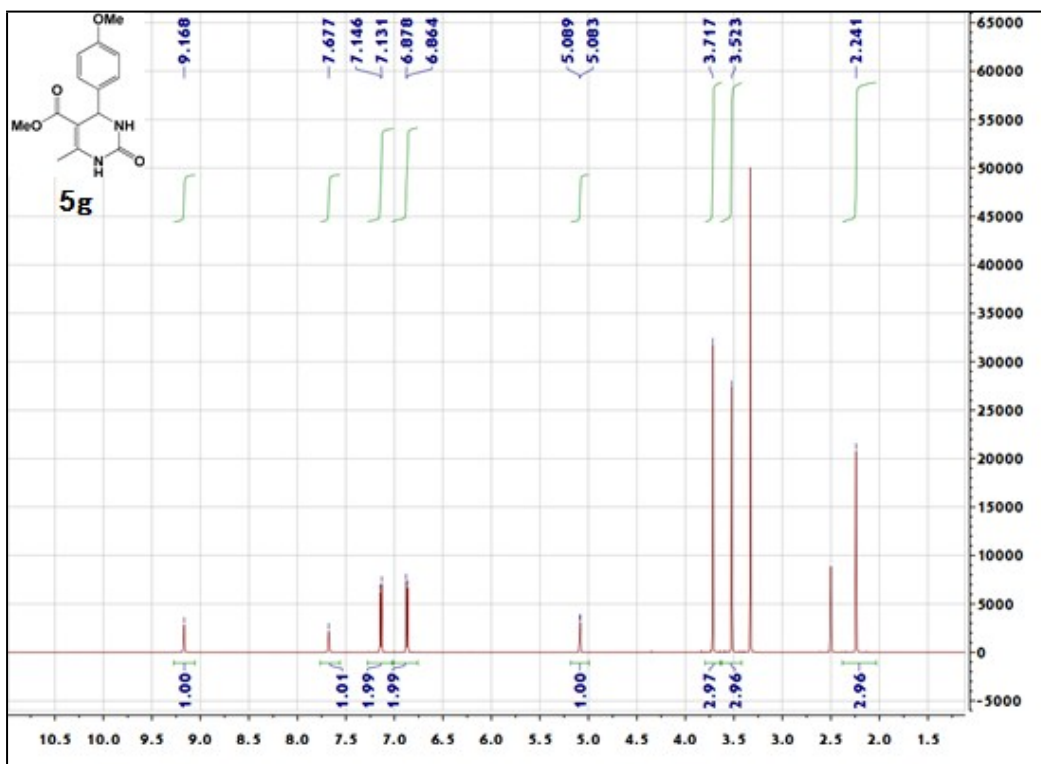

267

268

269

270

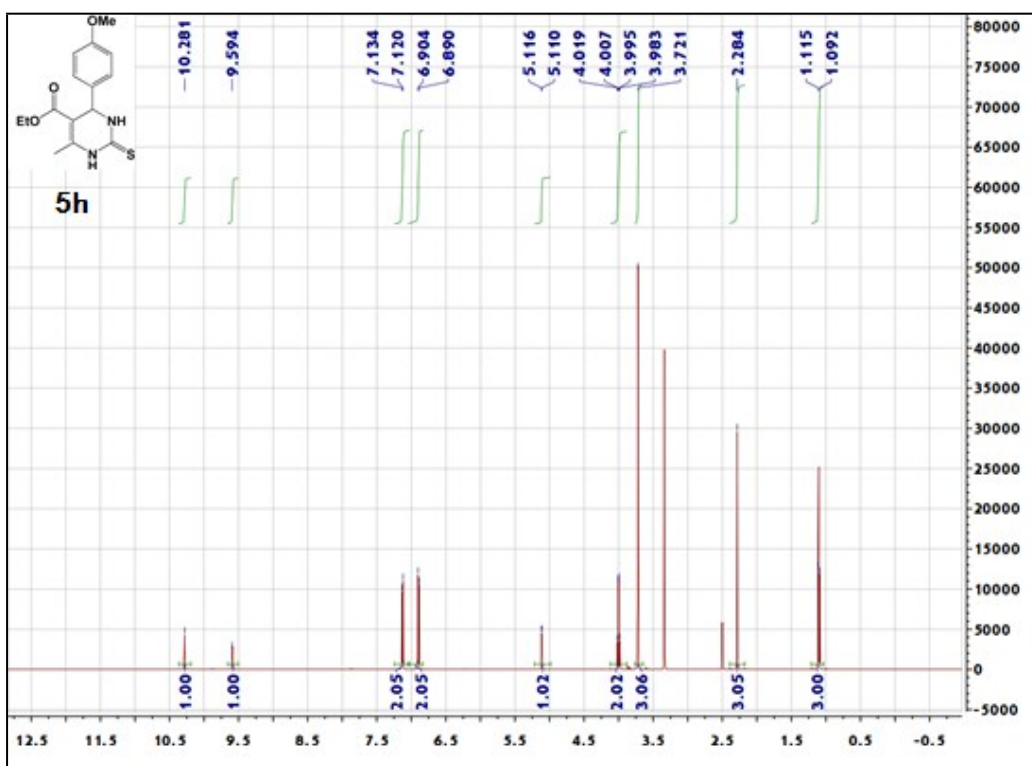

271

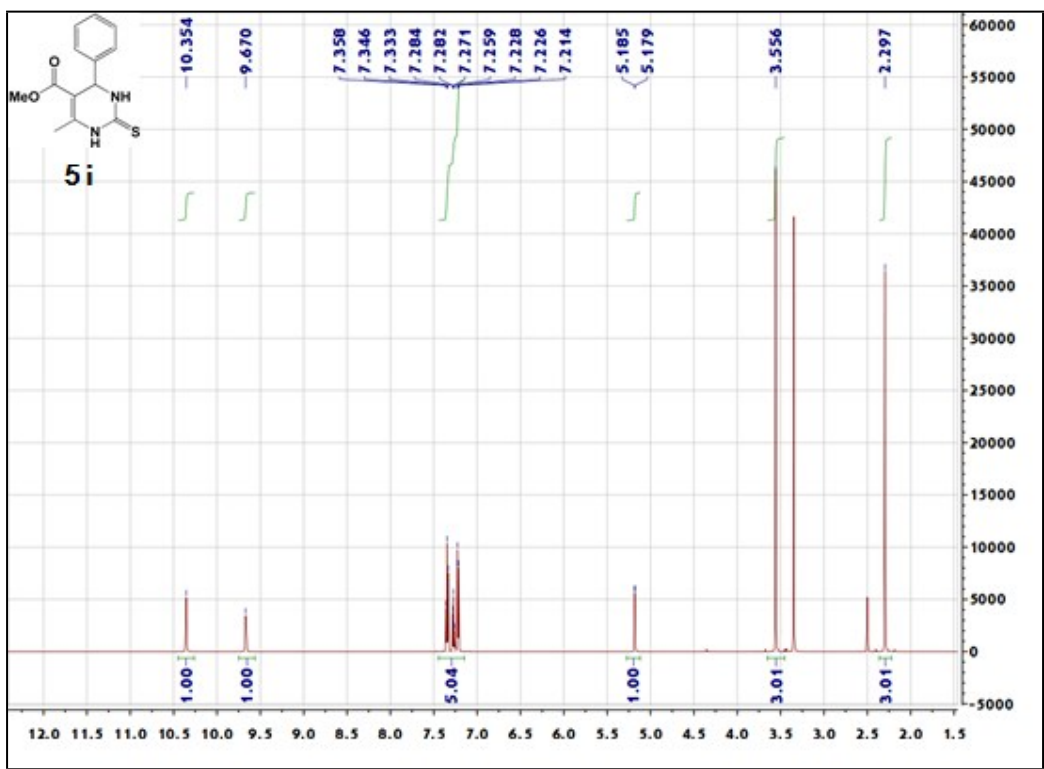

272

273

274

275

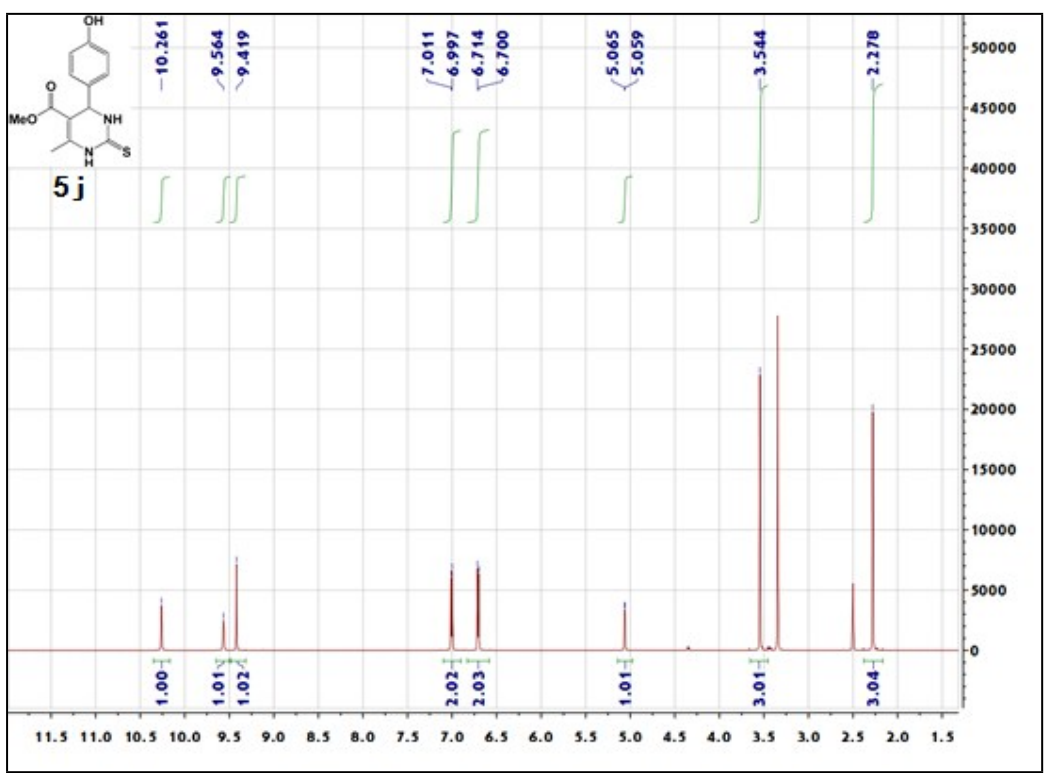

276

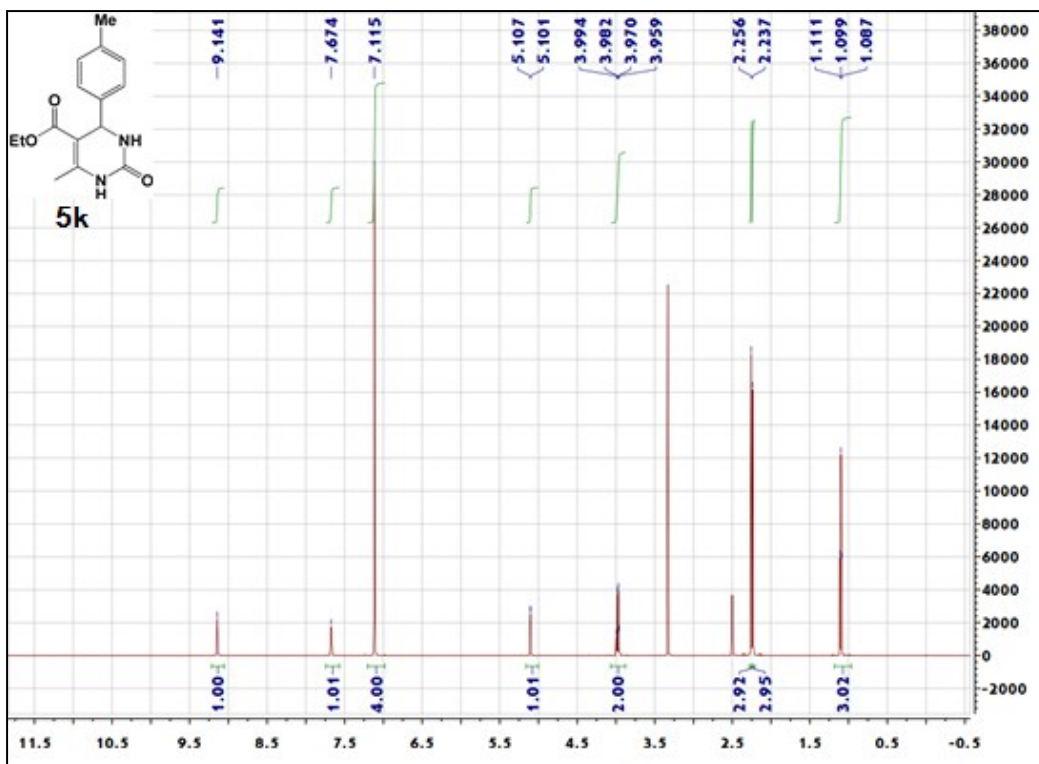

277  
278  
279  
280

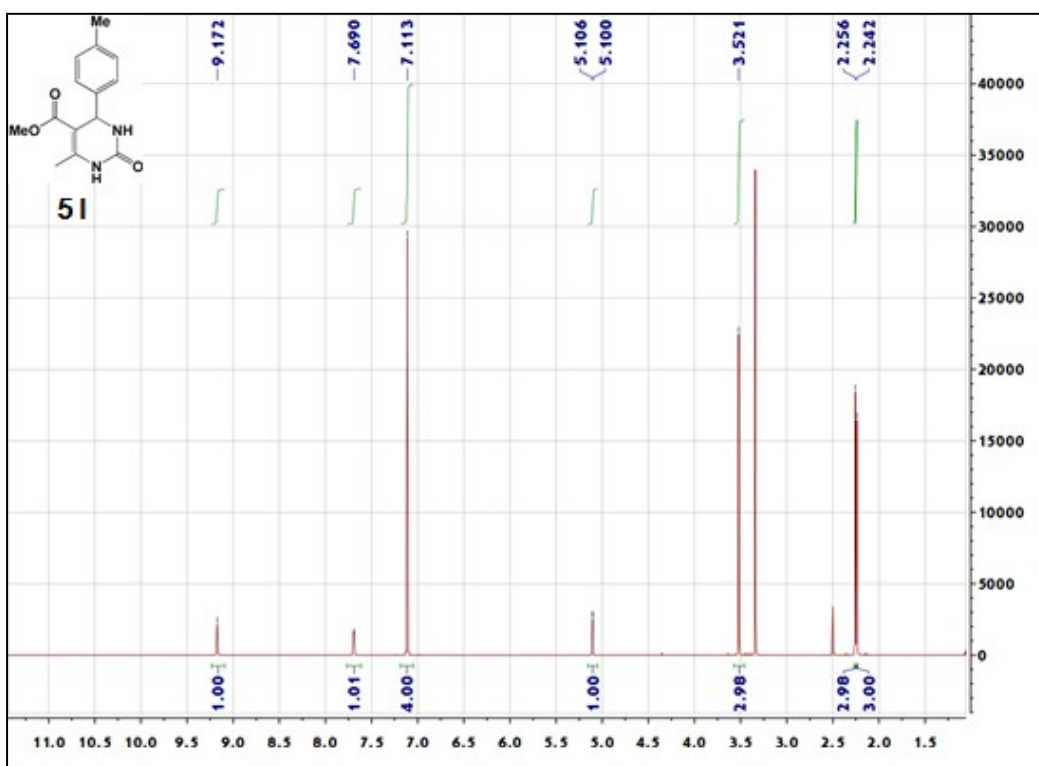

281  
282

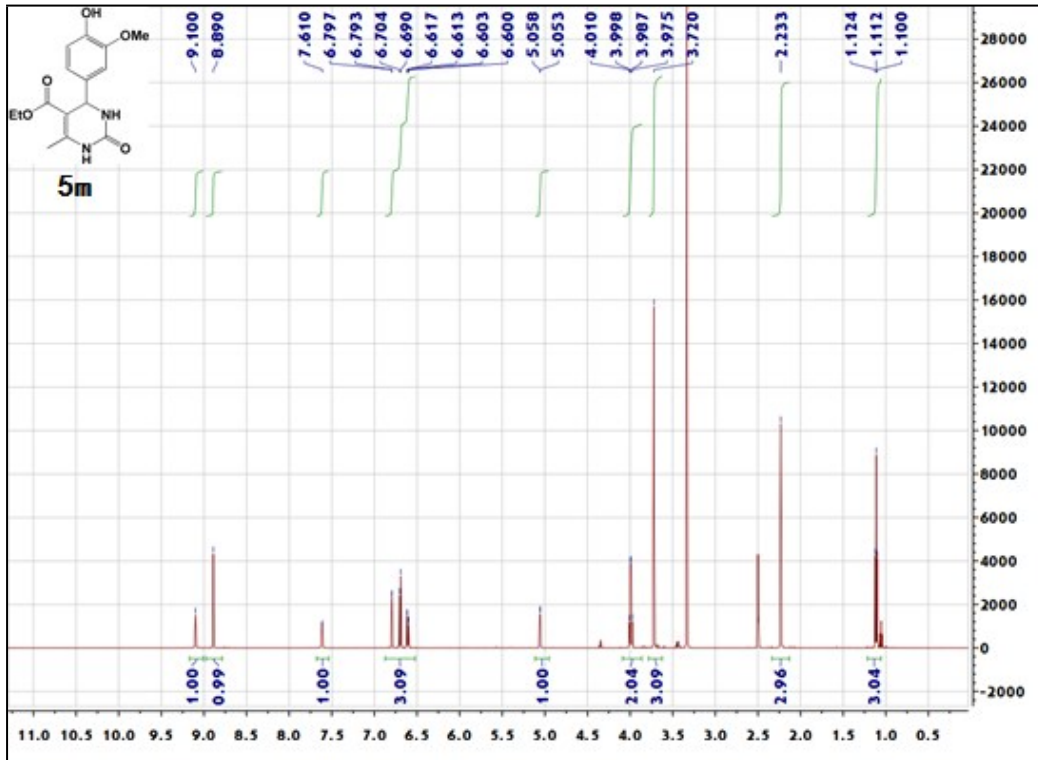

283  
284  
285  
286

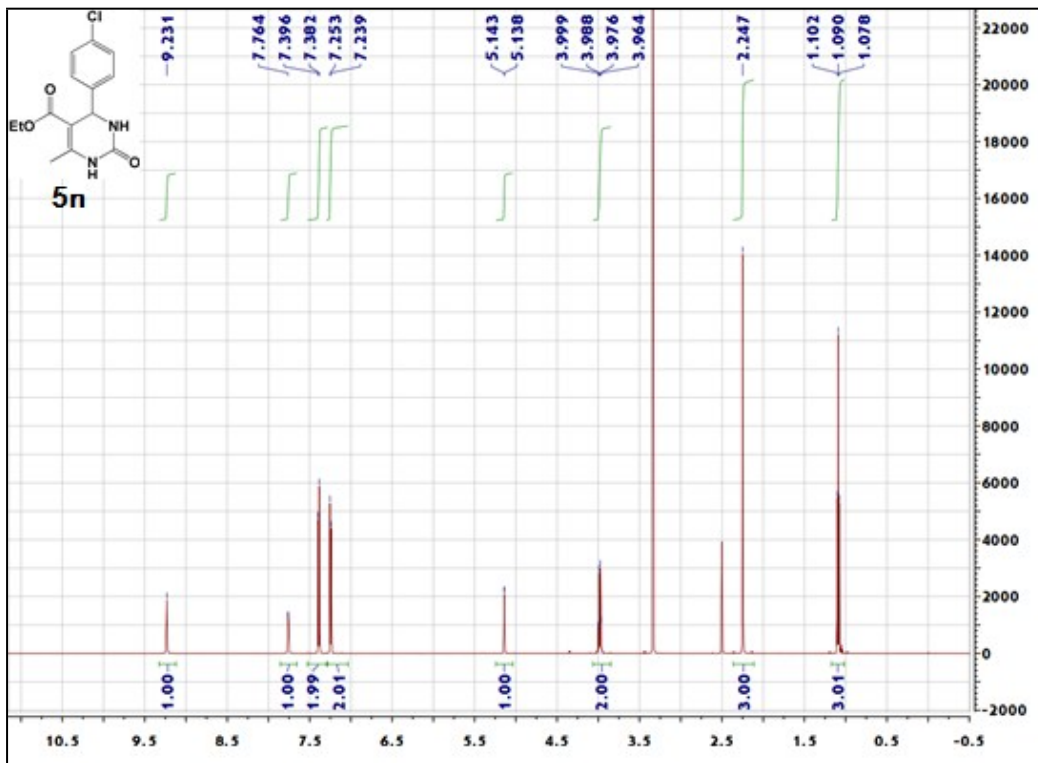

287  
288

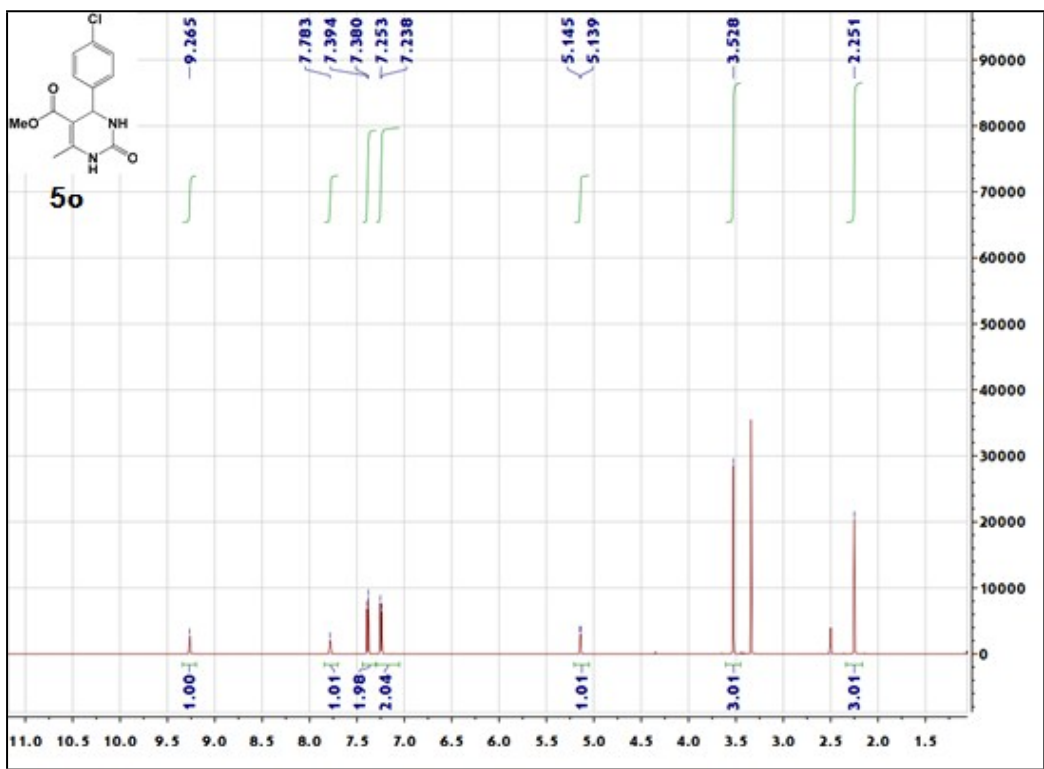

289  
290  
291  
292

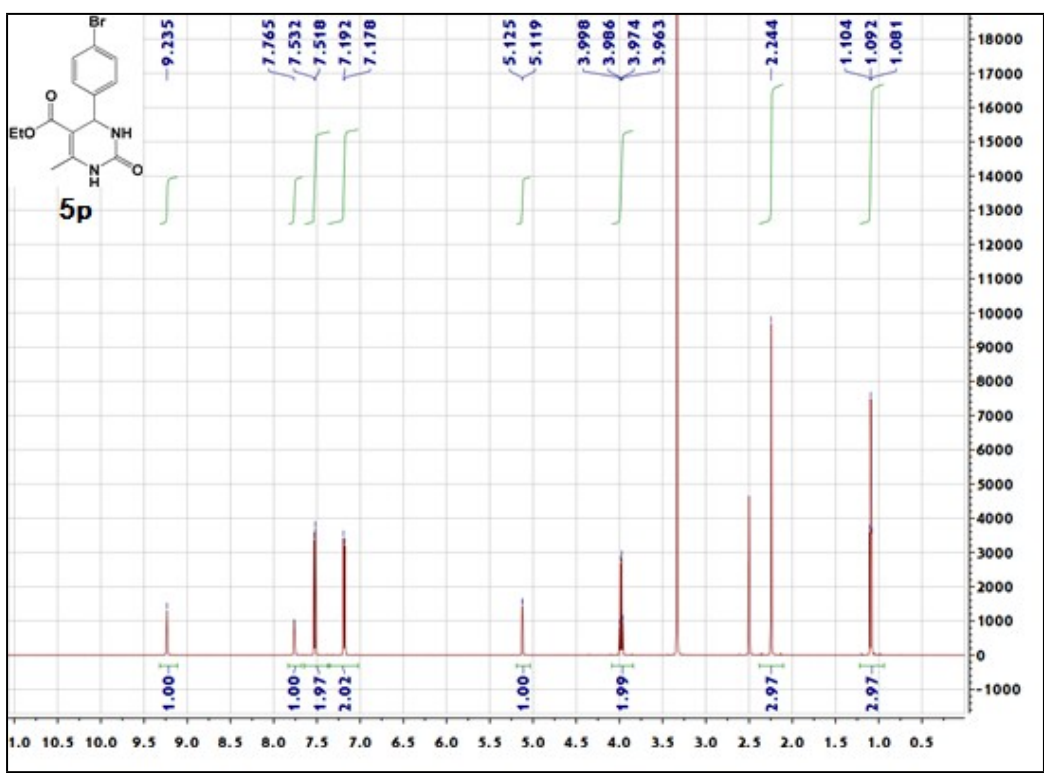

293  
294



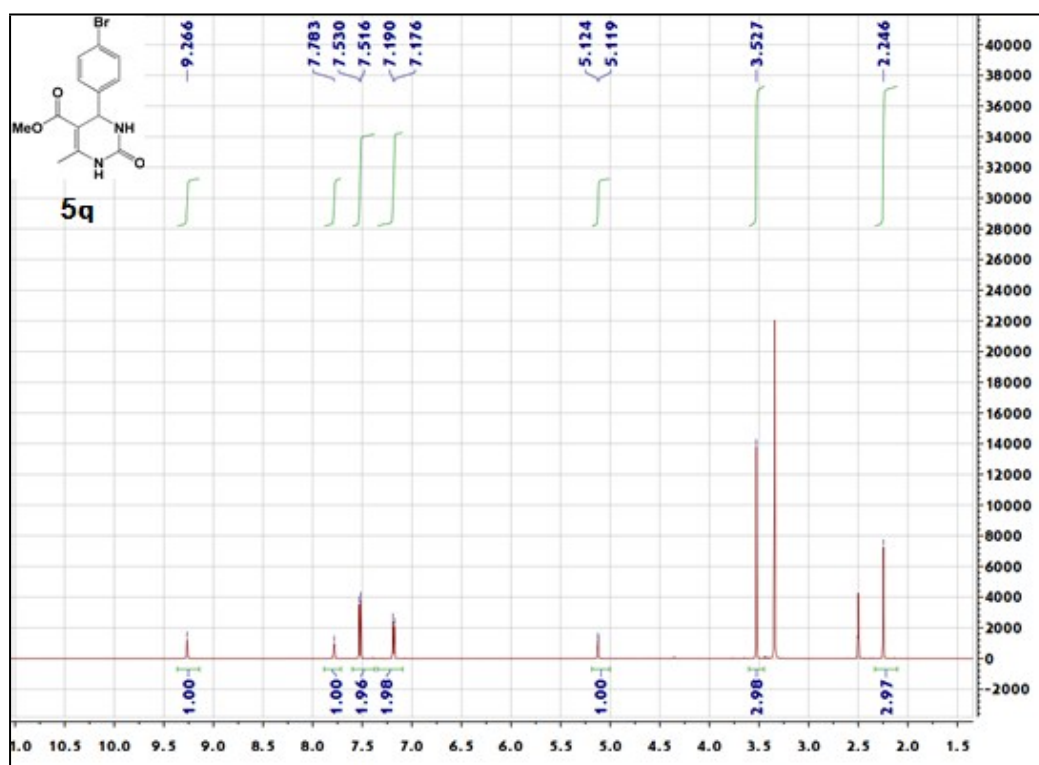

295

296

297

298

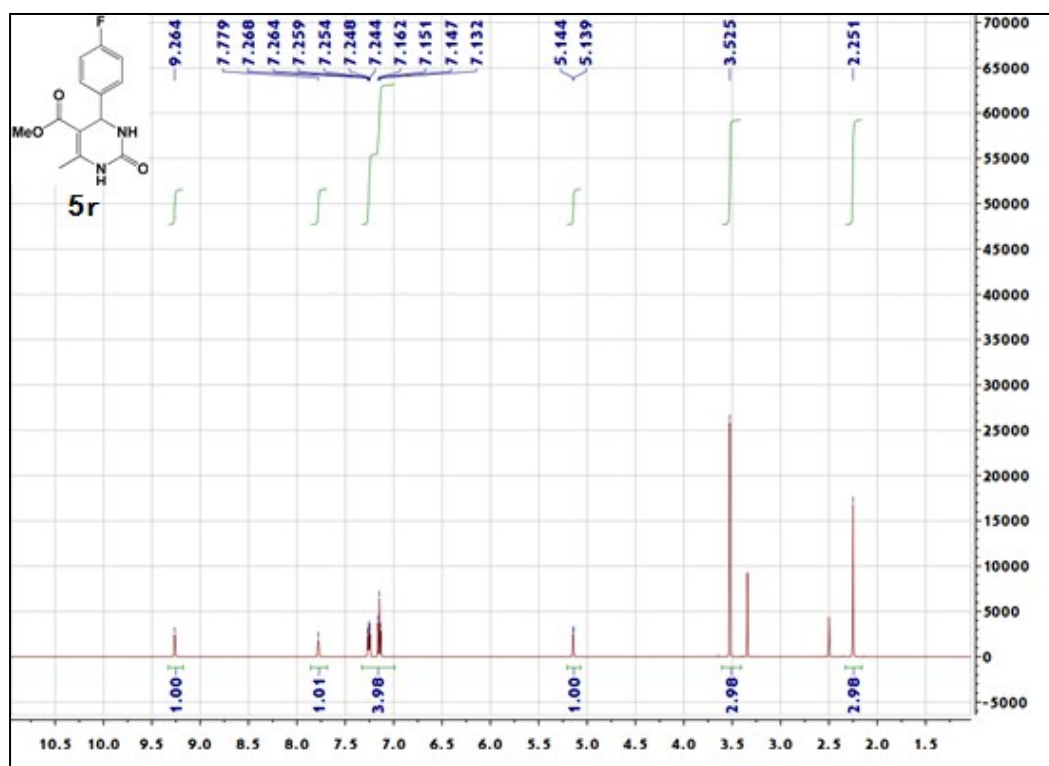

299

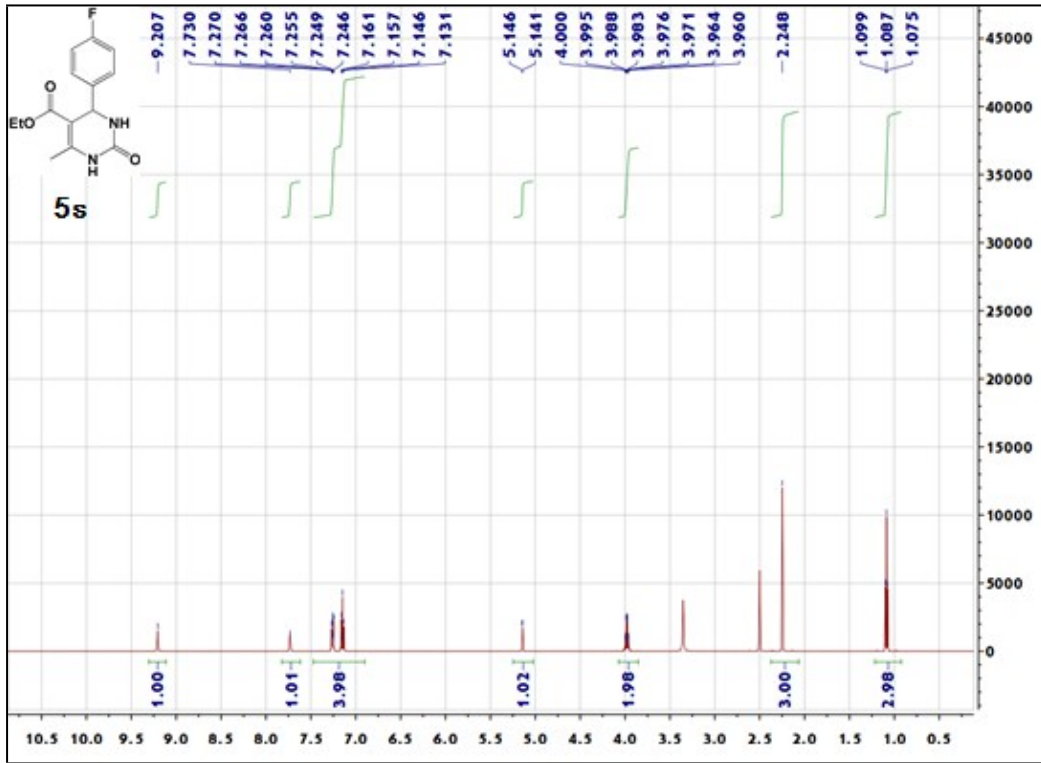

300  
301  
302  
303

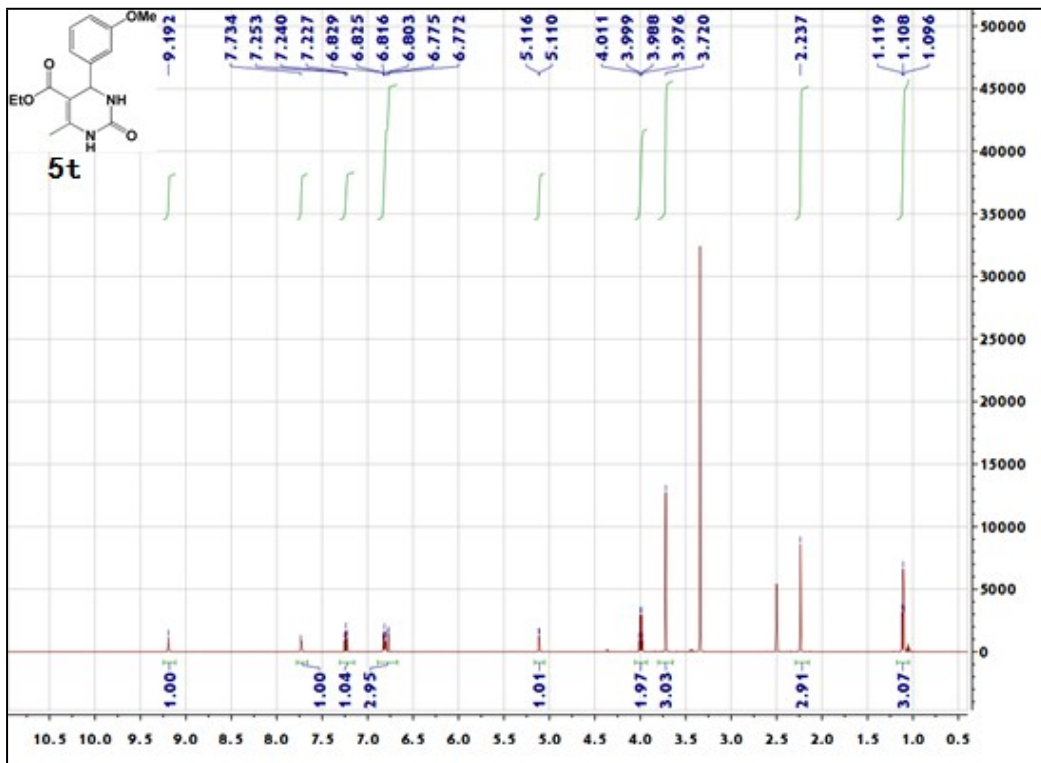

304  
305

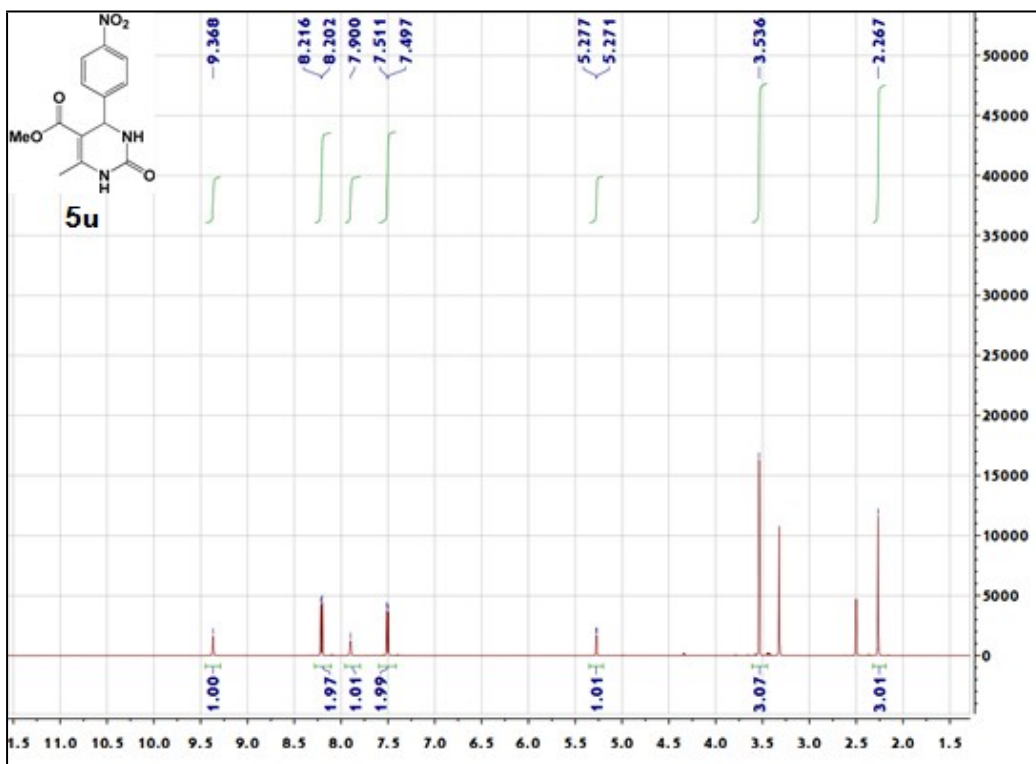

306  
307  
308  
309

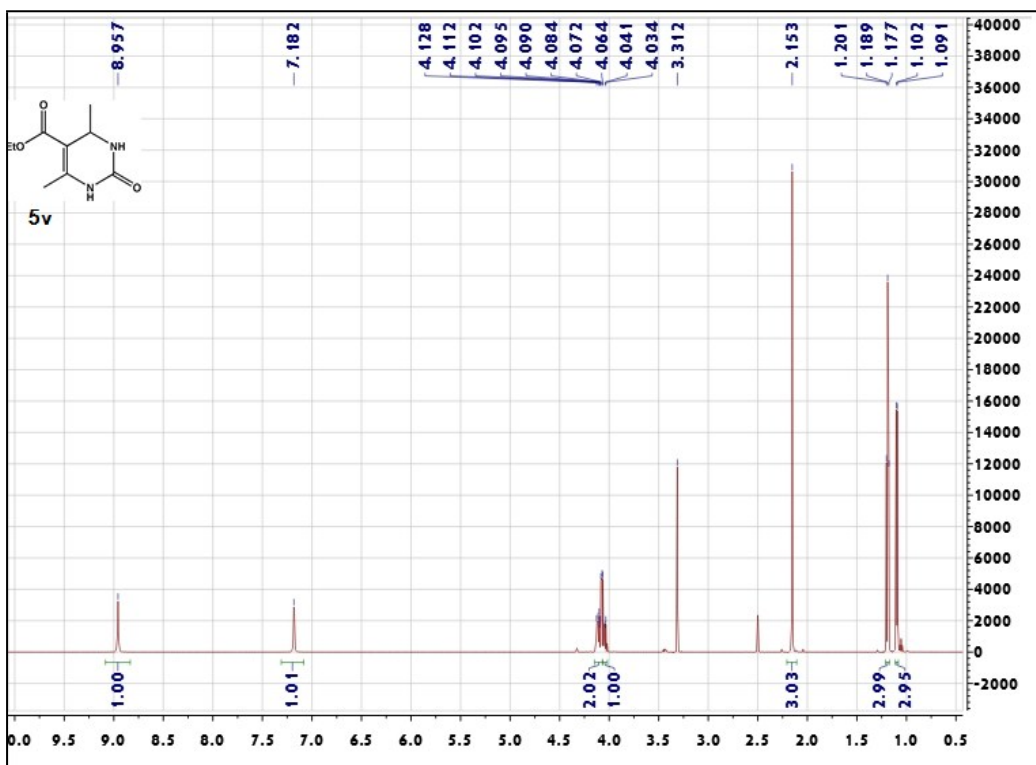

310  
311  
312  
313

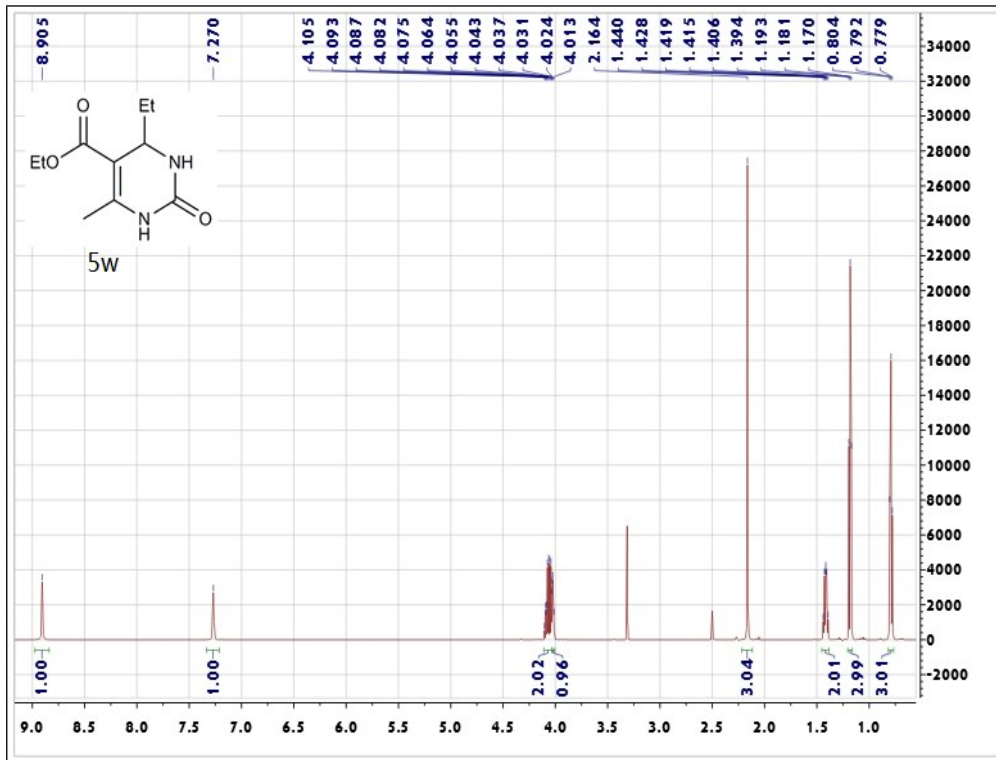

314  
315  
316  
317

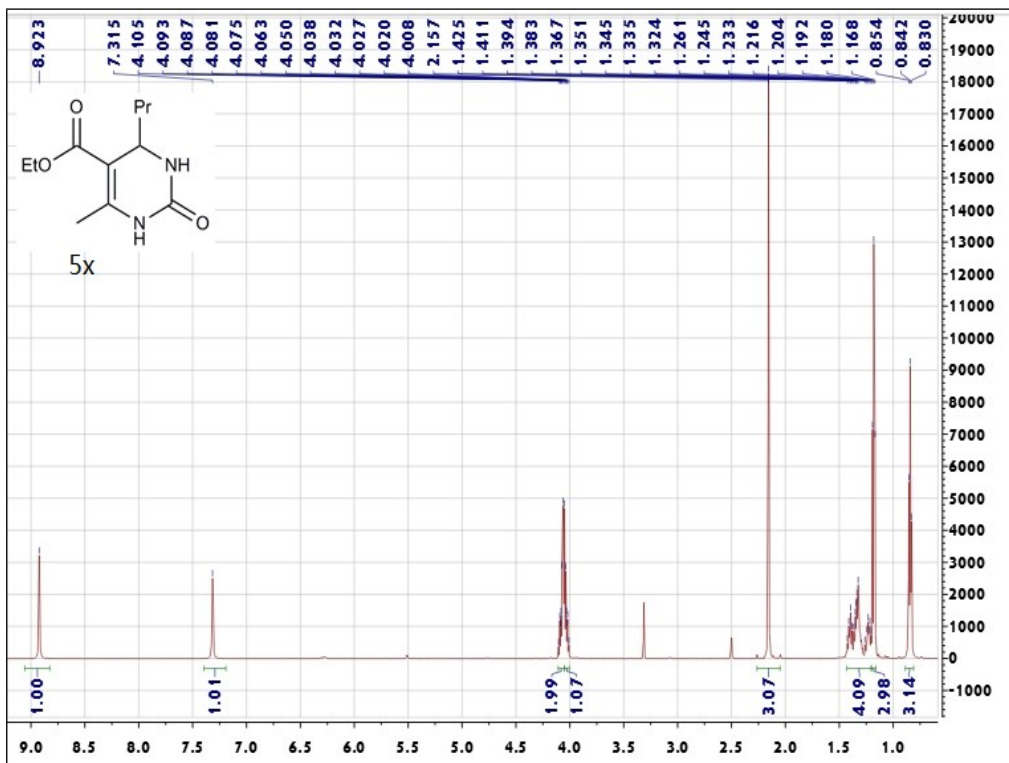

318  
319  
320  
321

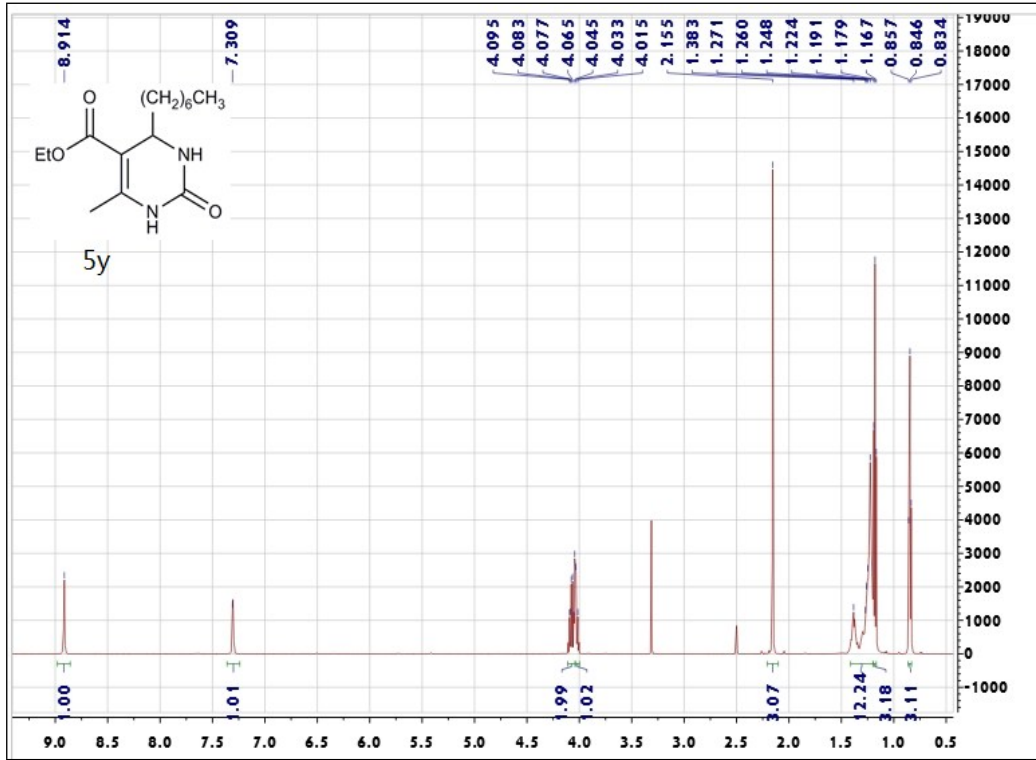

322  
323  
324  
325

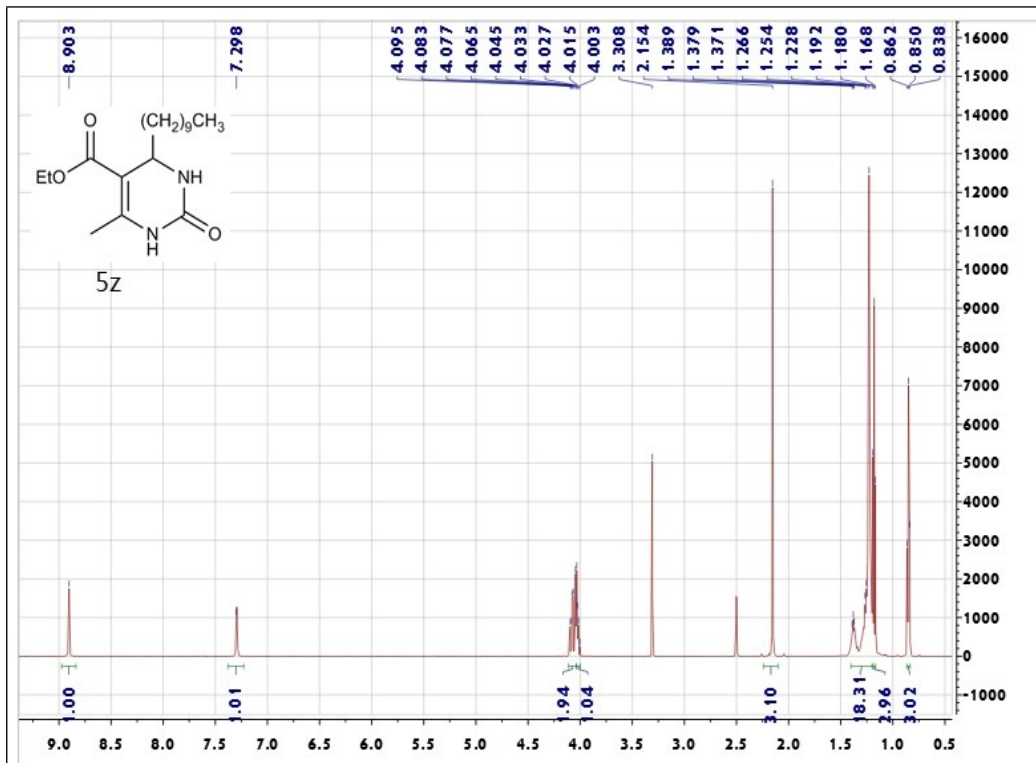

326  
327  
328  
329

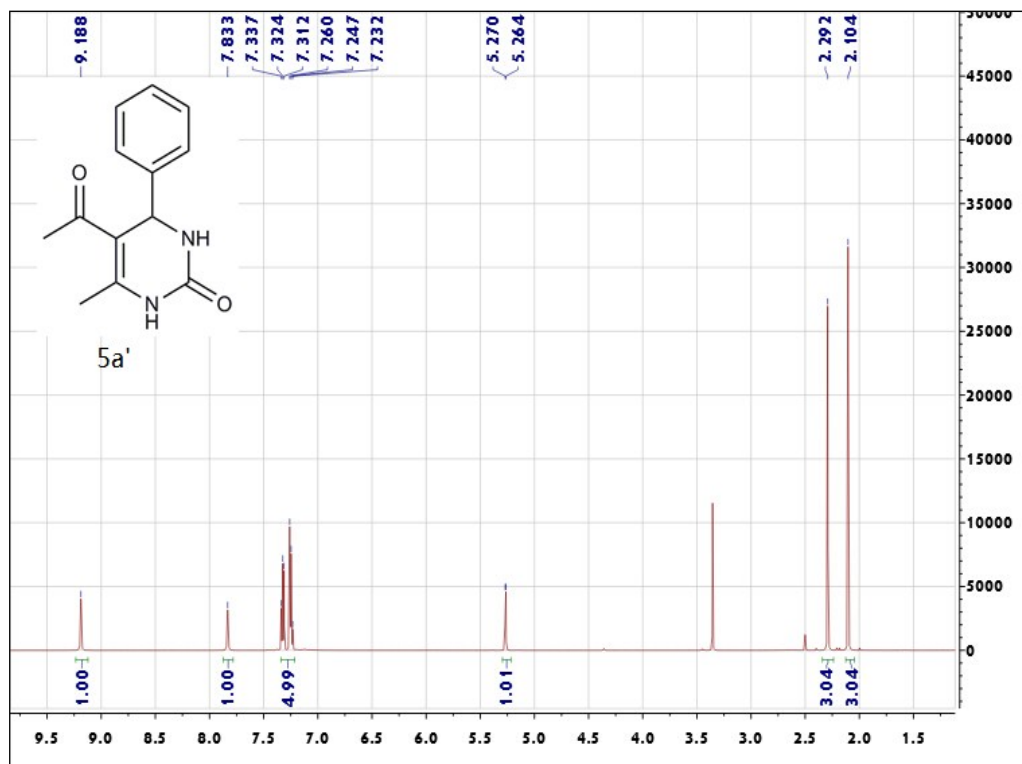

330

331

332

333

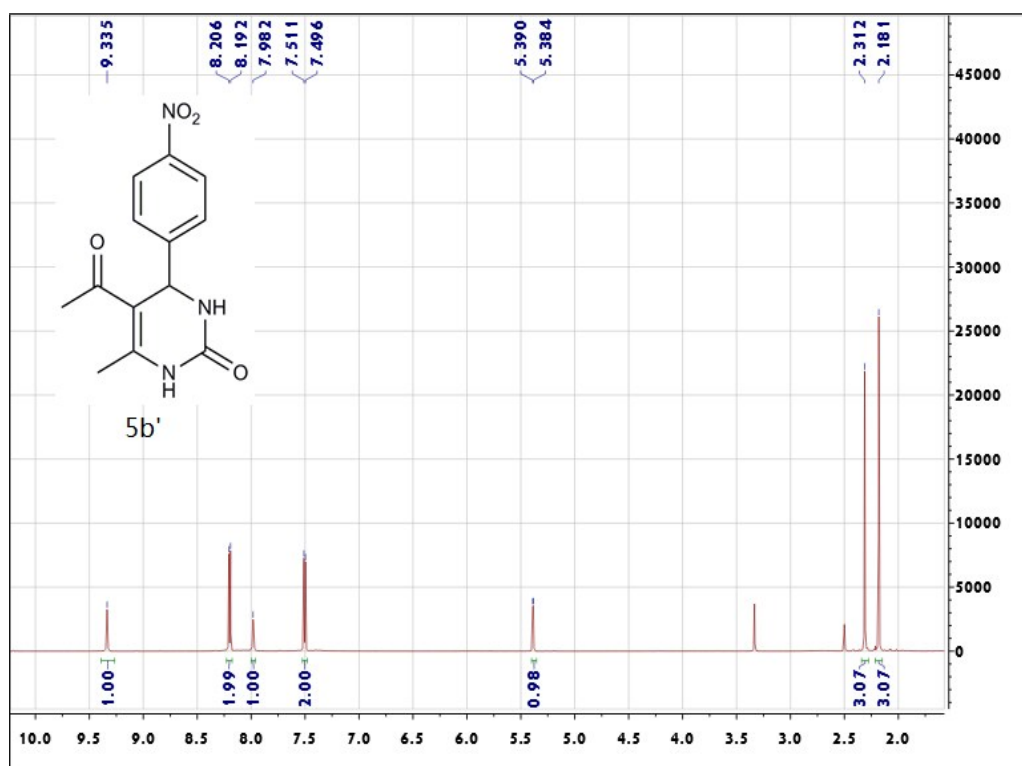

334

335

336

337

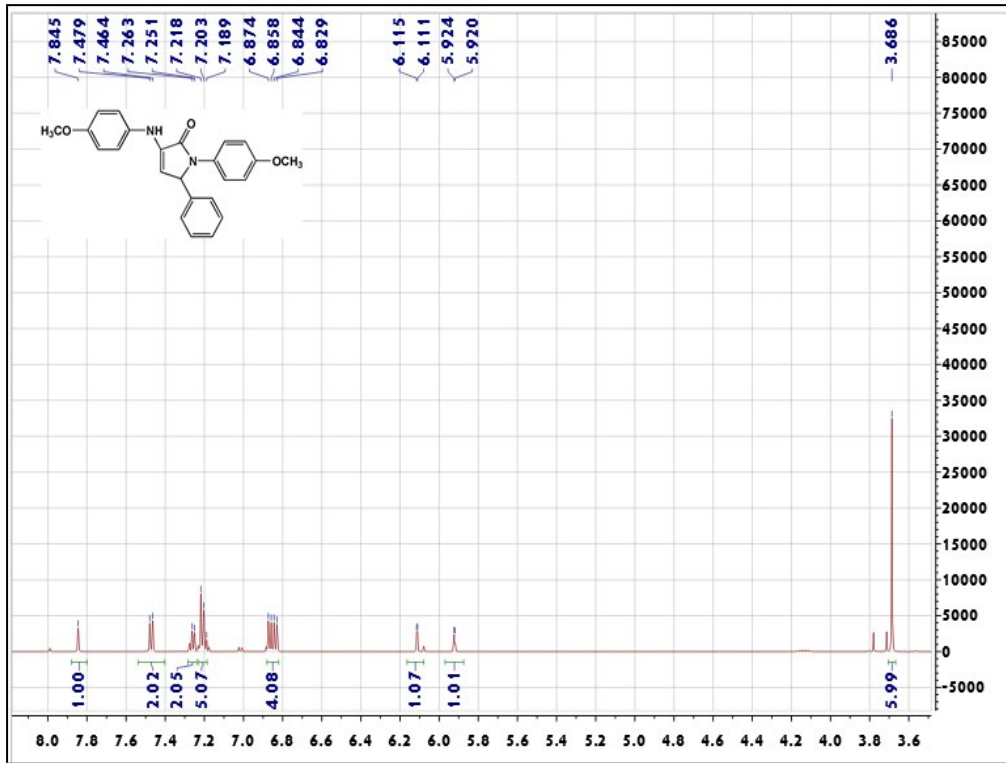

338  
339  
340  
341

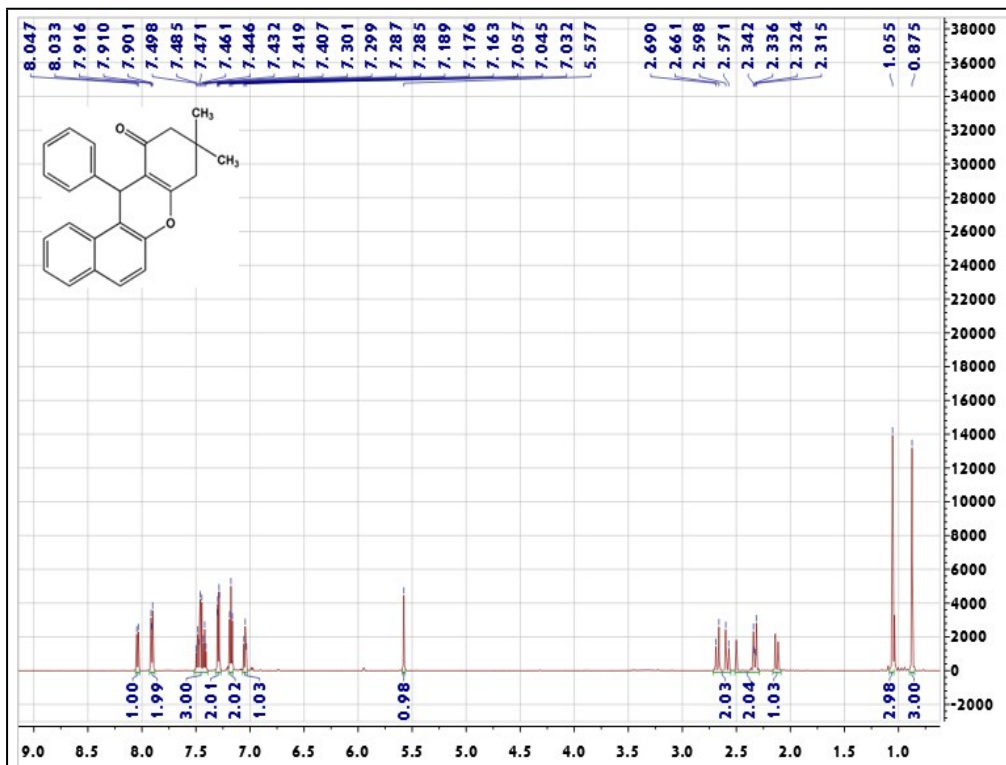

342  
343  
344  
345

346  $^{13}\text{C}$  NMR for all compounds

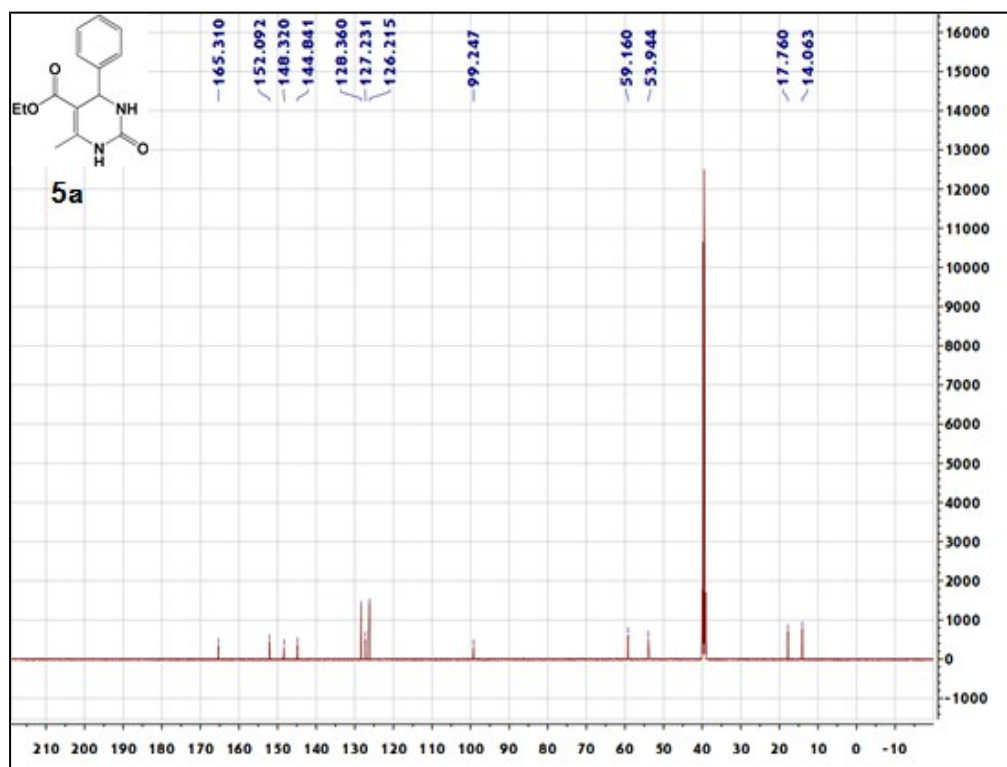

347

348

349

350

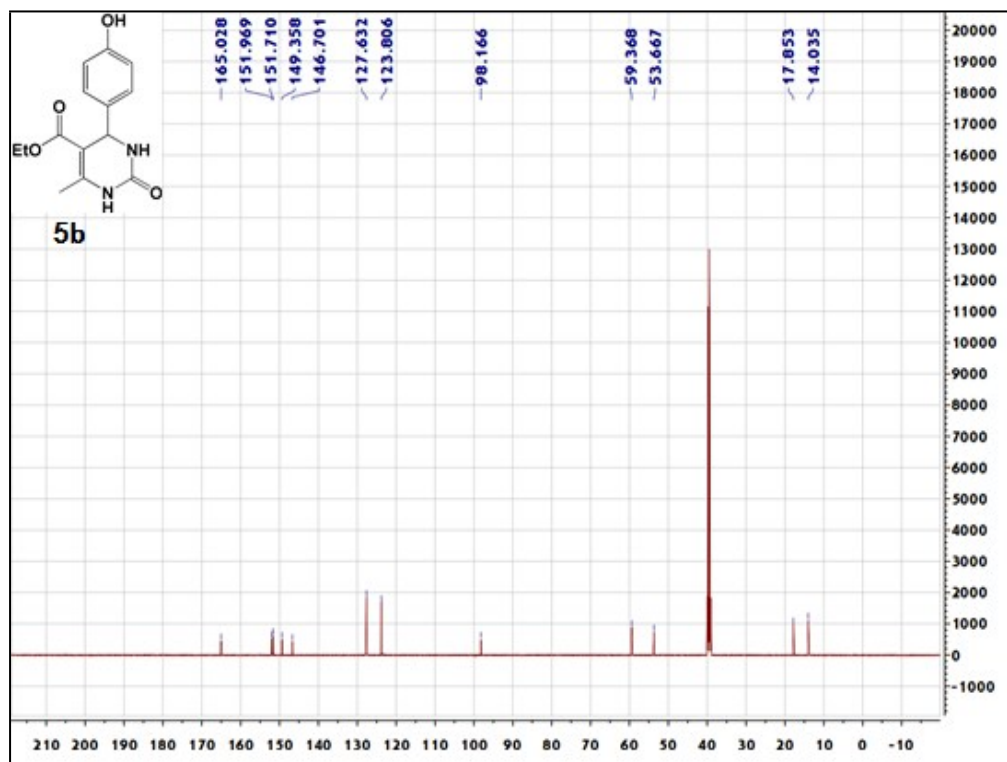

351



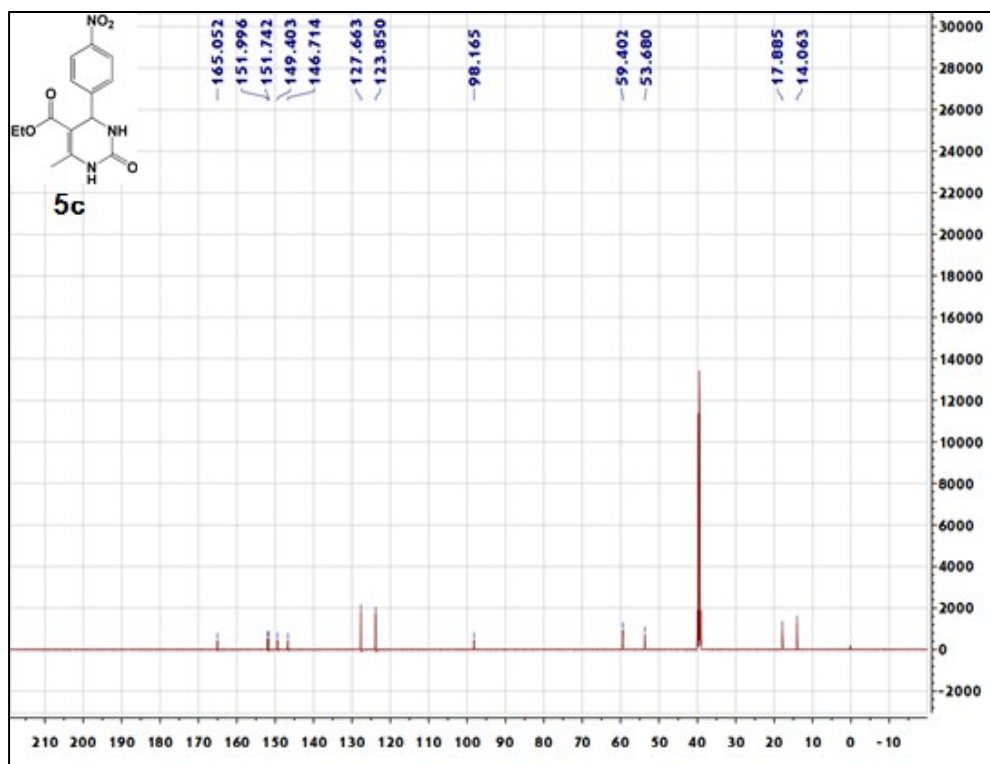

352

353

354

355

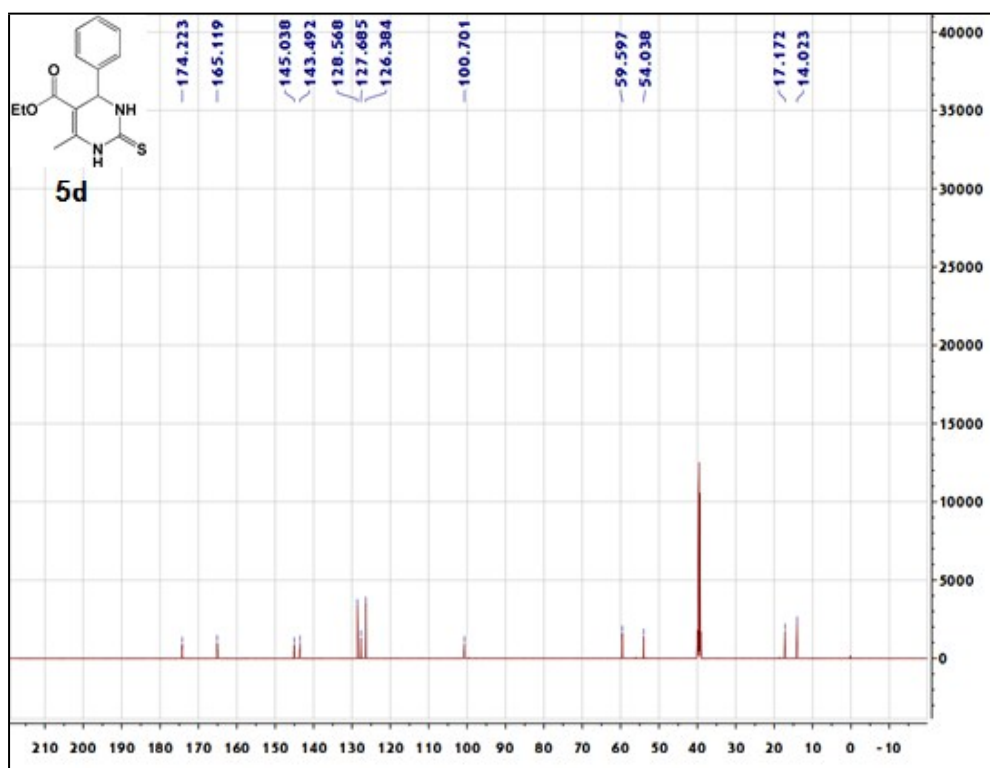

356

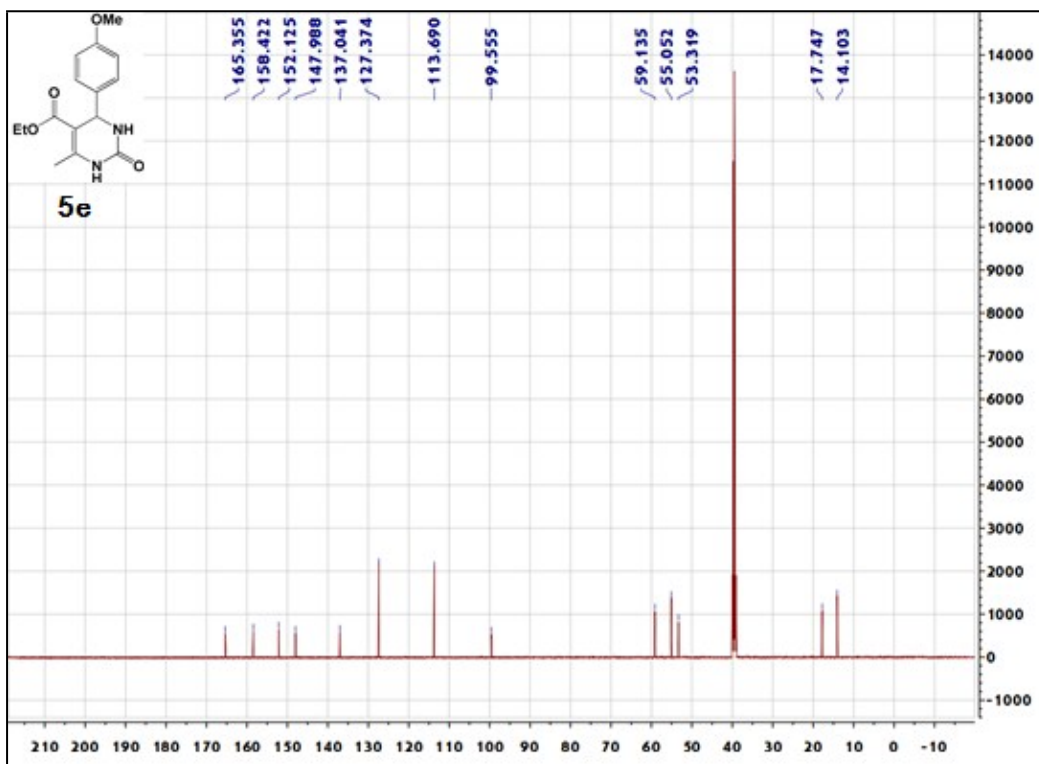

357  
358  
359  
360

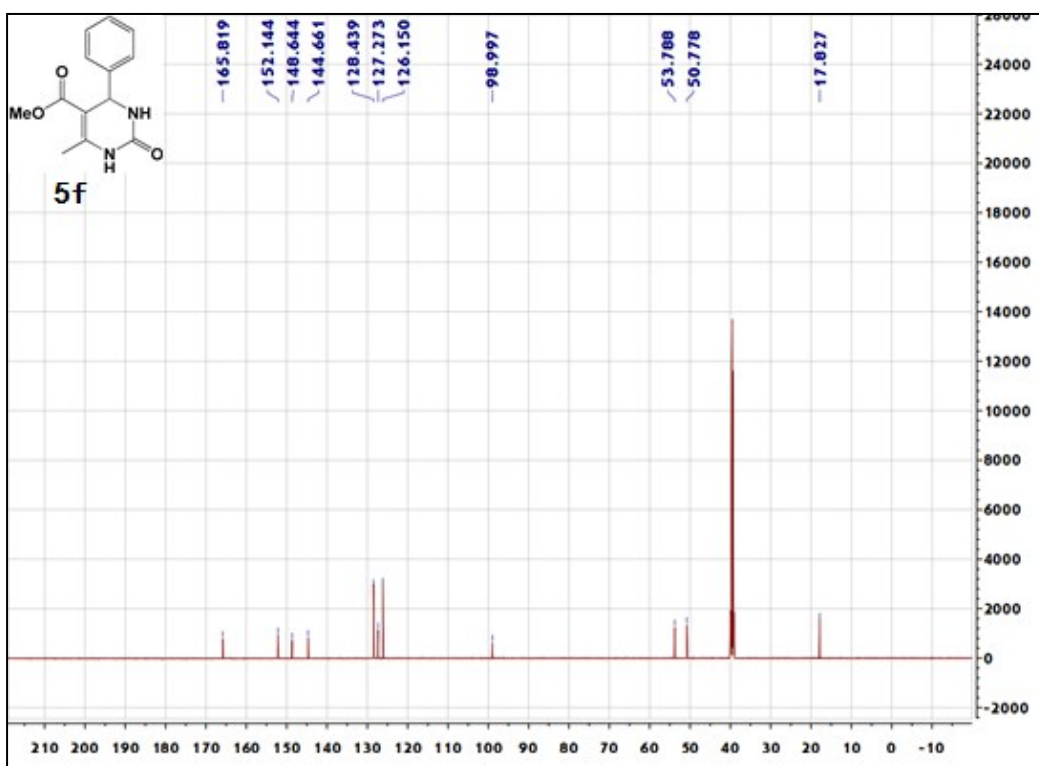

361  
362

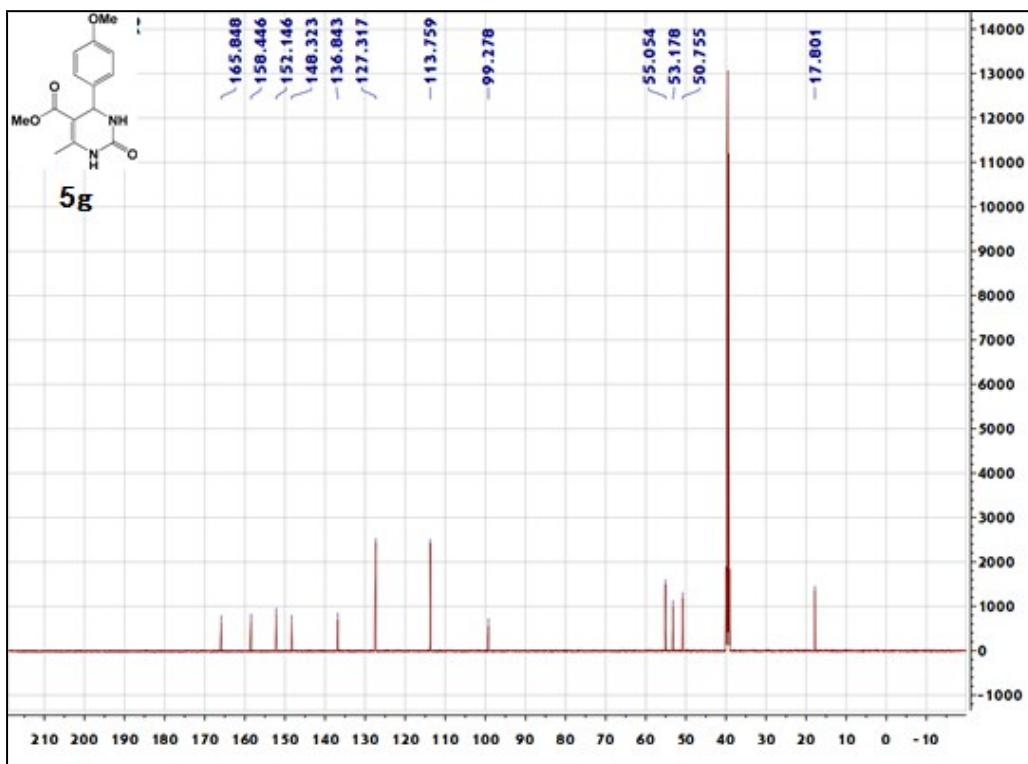

363  
364  
365  
366

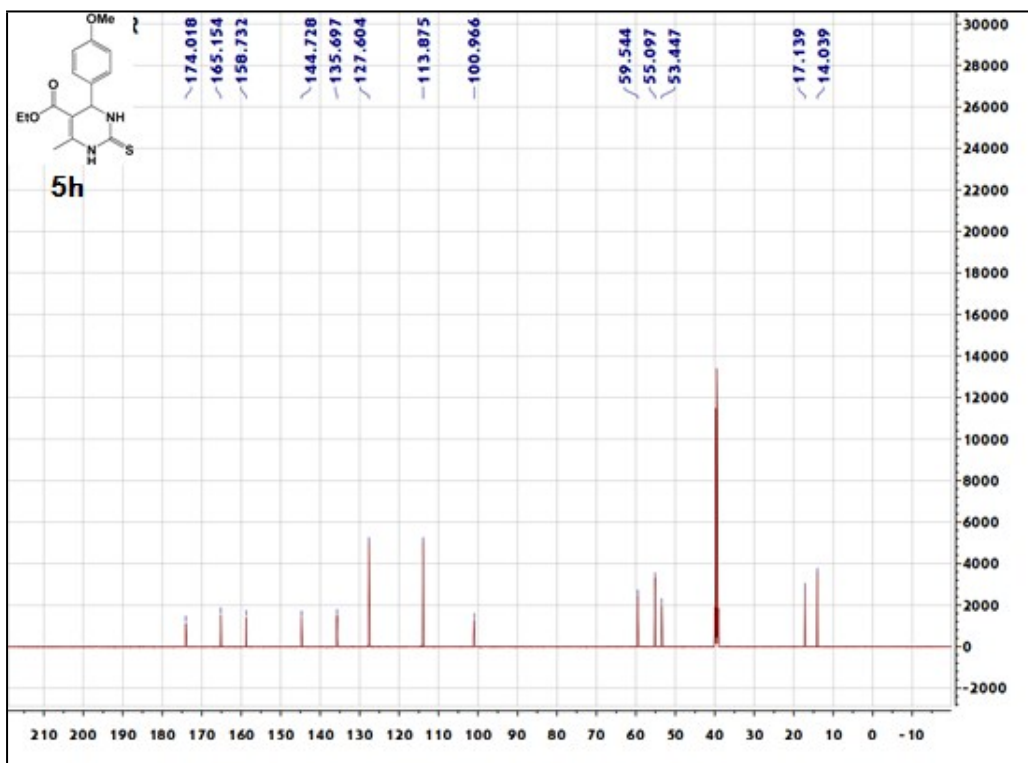

367

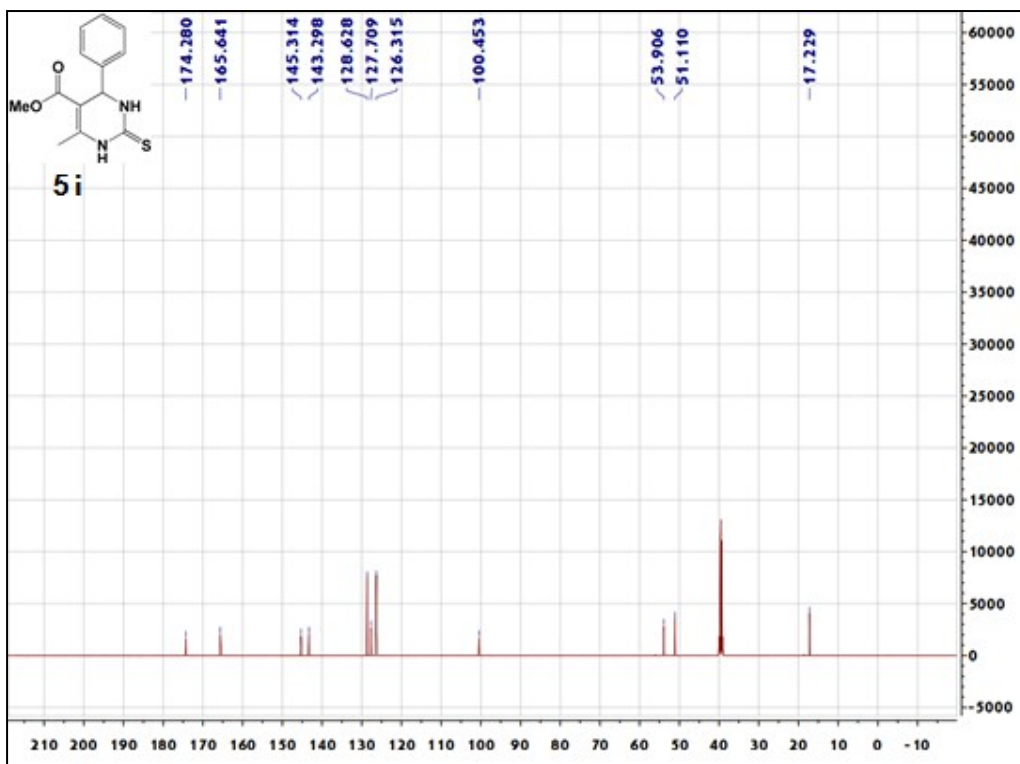

368  
369  
370  
371

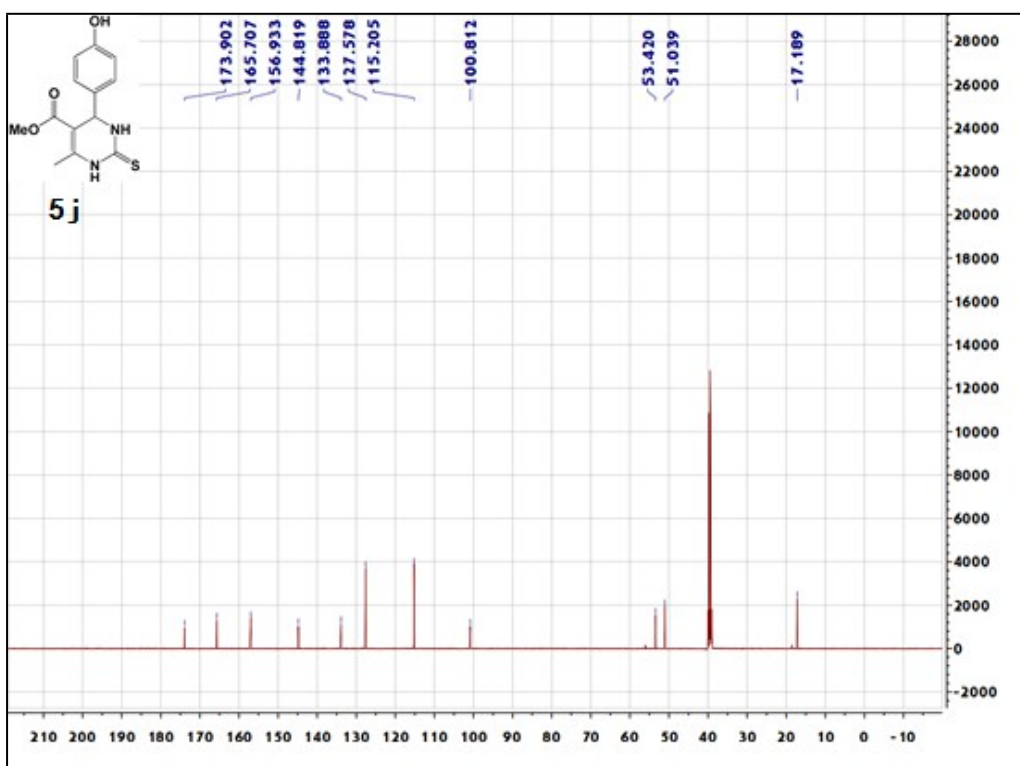

372  
373

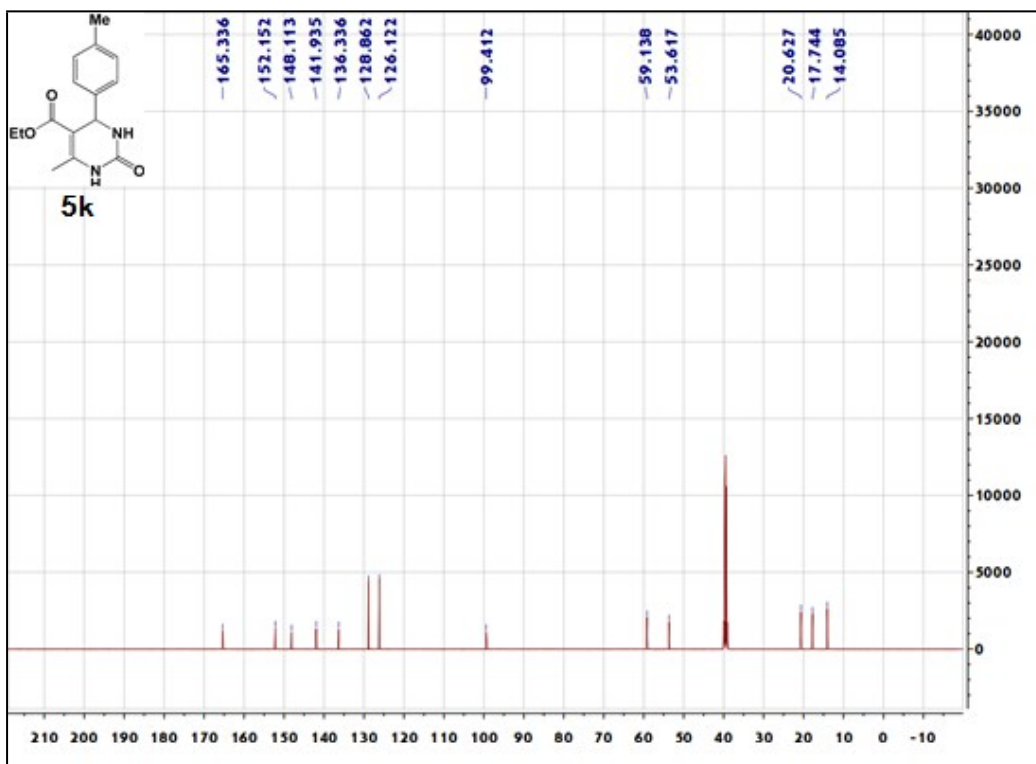

374  
375  
376  
377

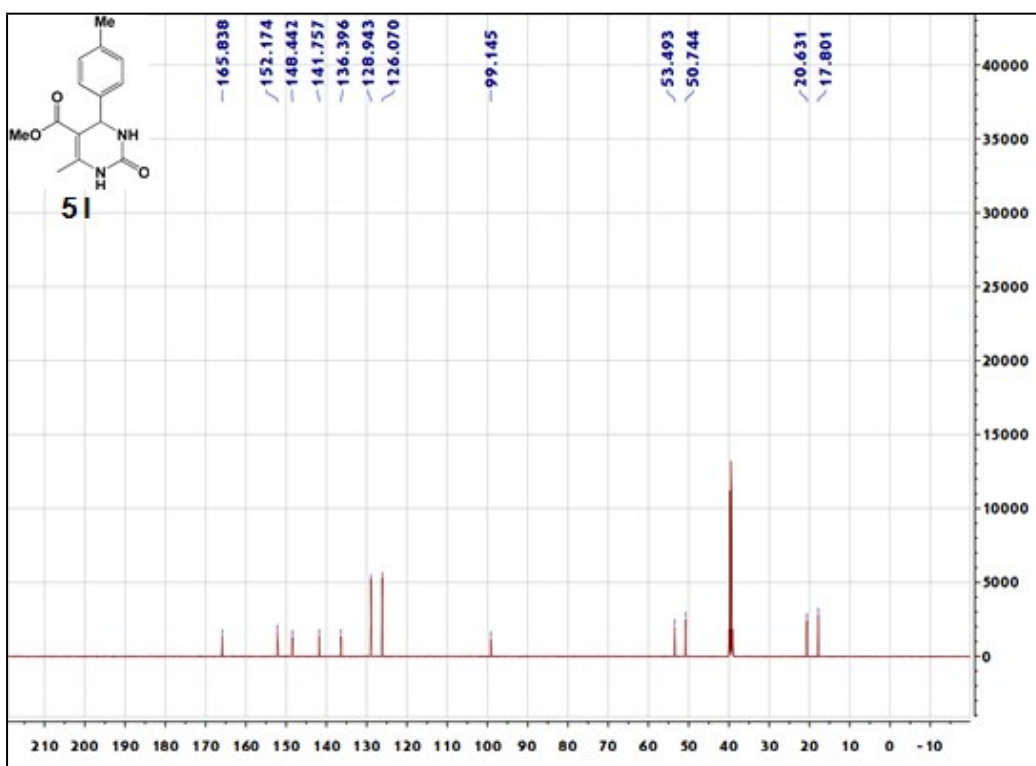

378  
379  
380

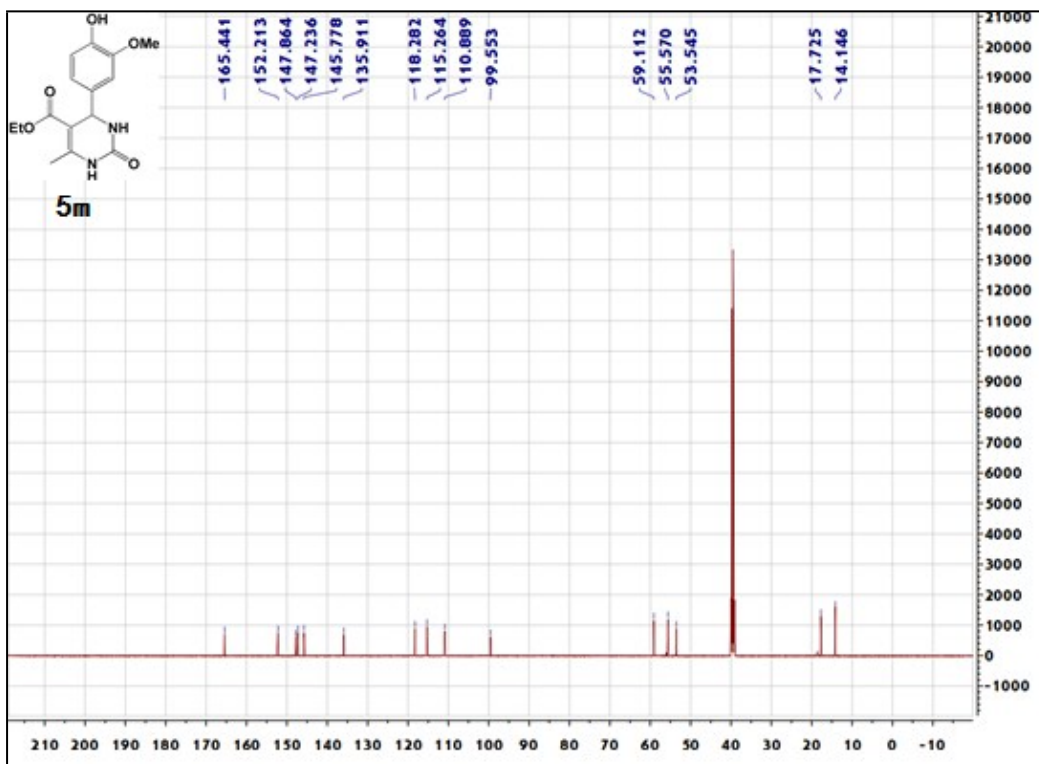

381

382

383

384

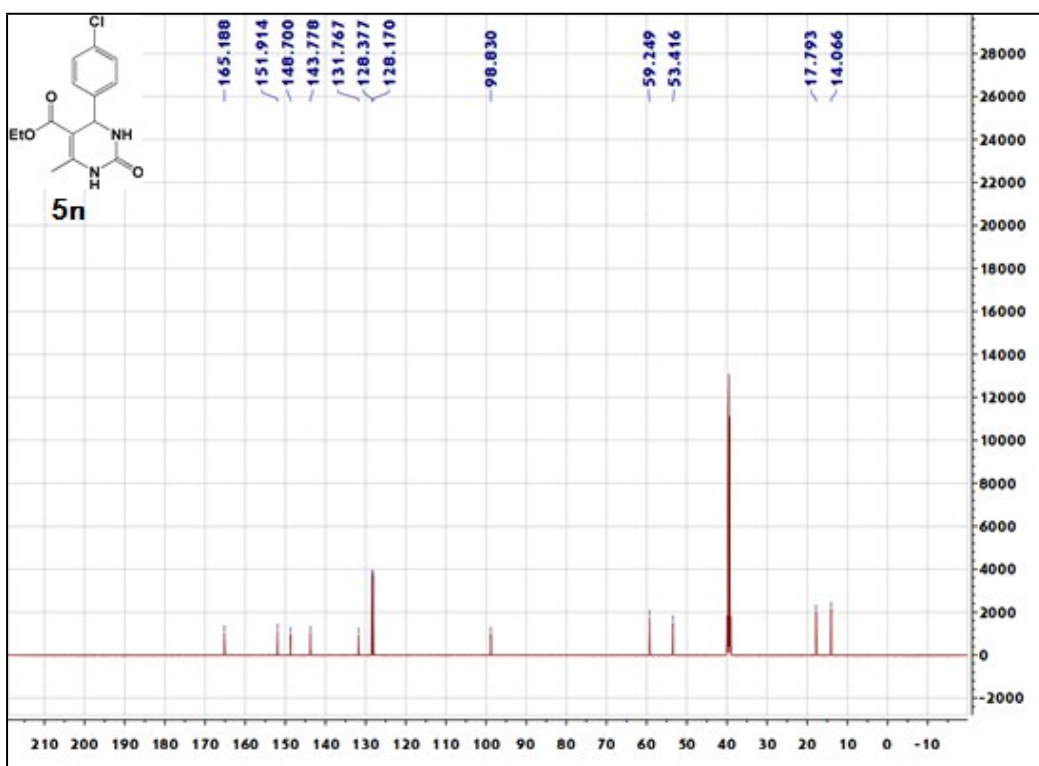

385

386

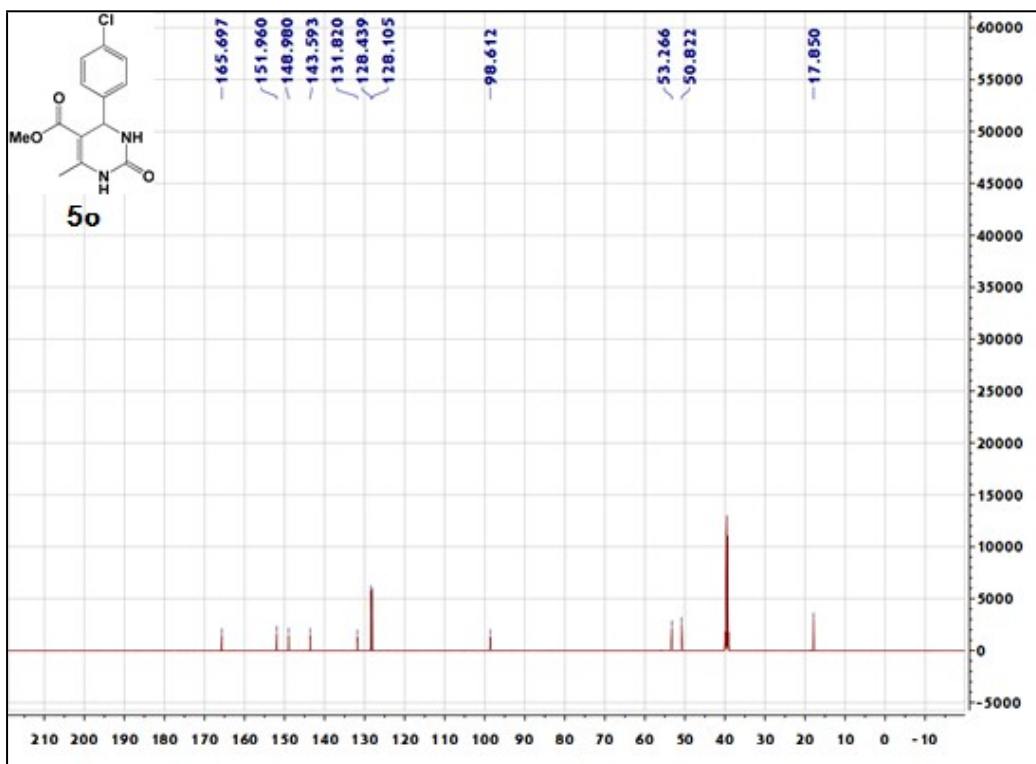

387  
388  
389  
390

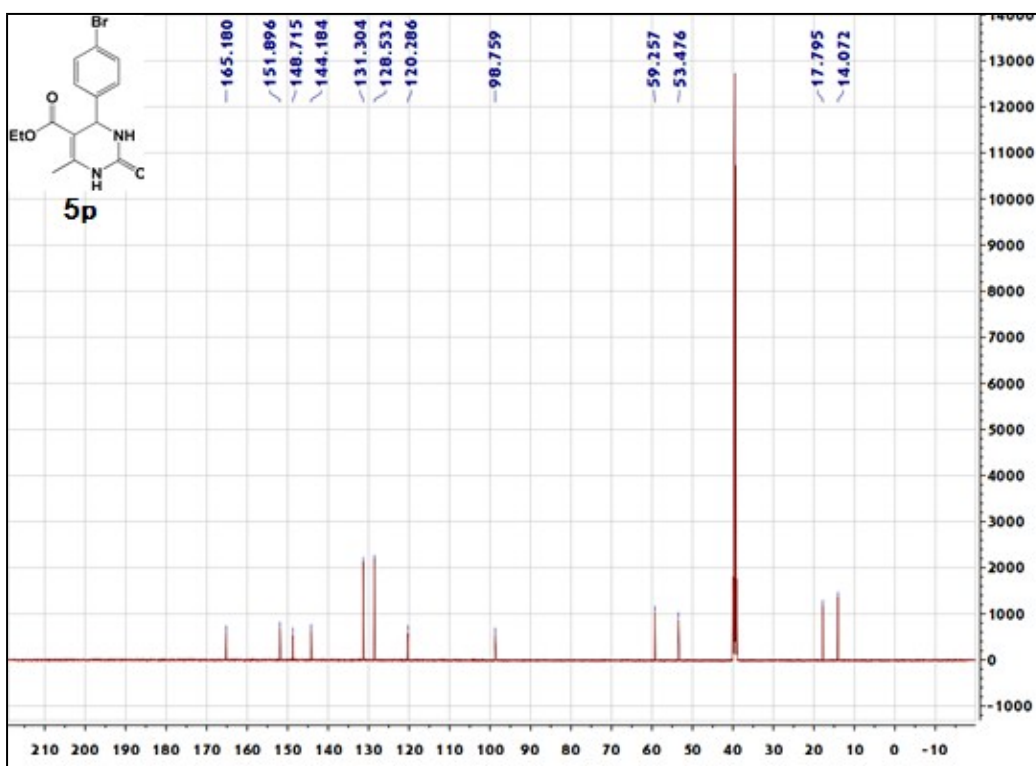

391  
392  
393

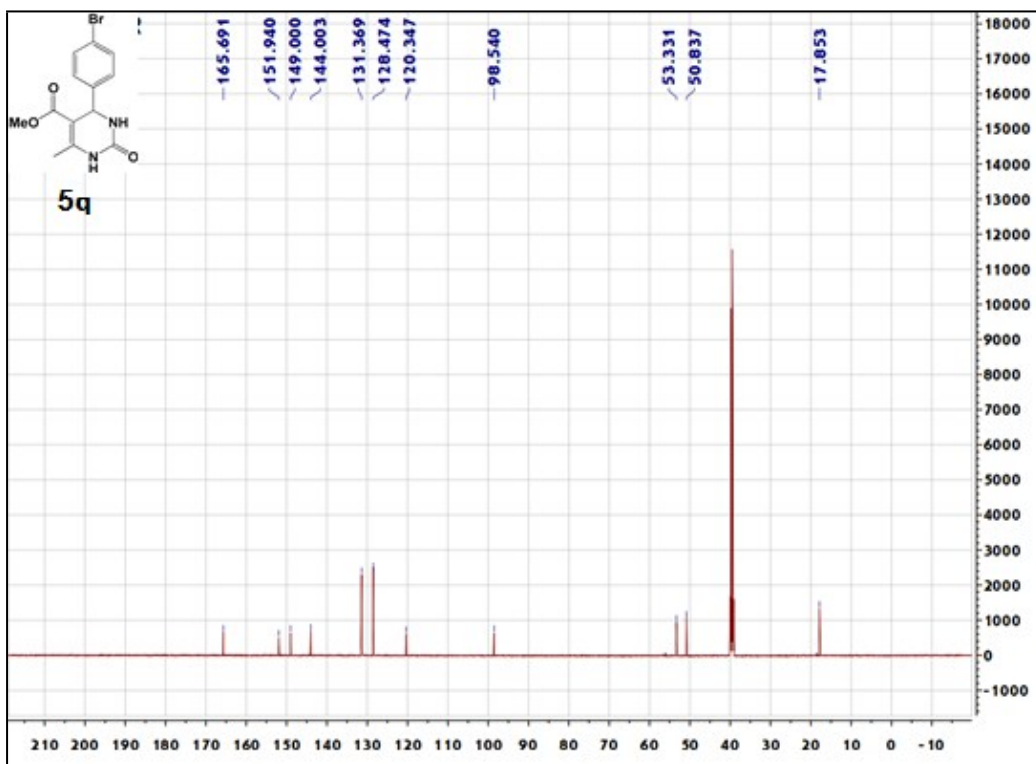

394  
395  
396  
397

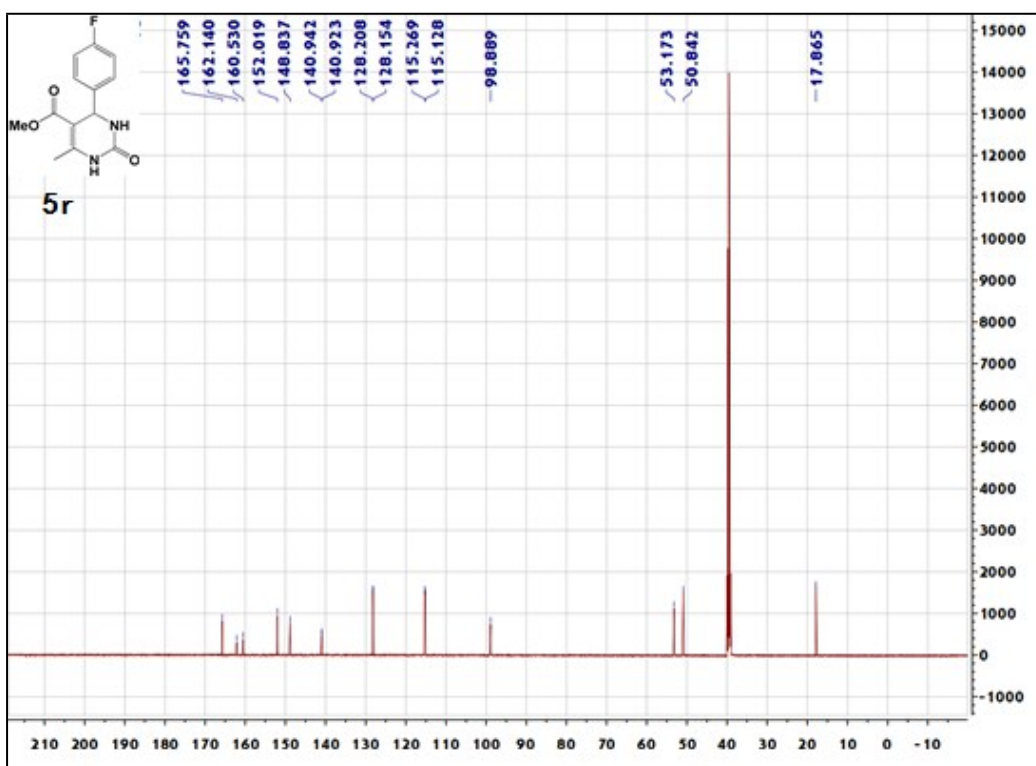

398  
399  
400



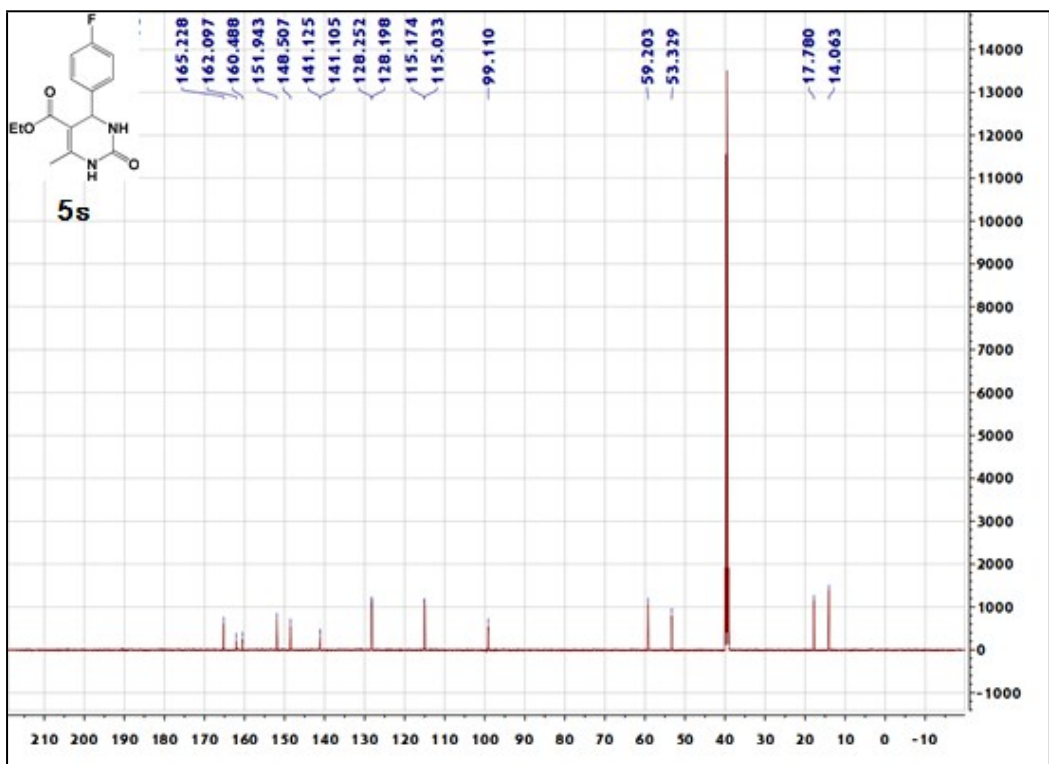

401  
402  
403  
404

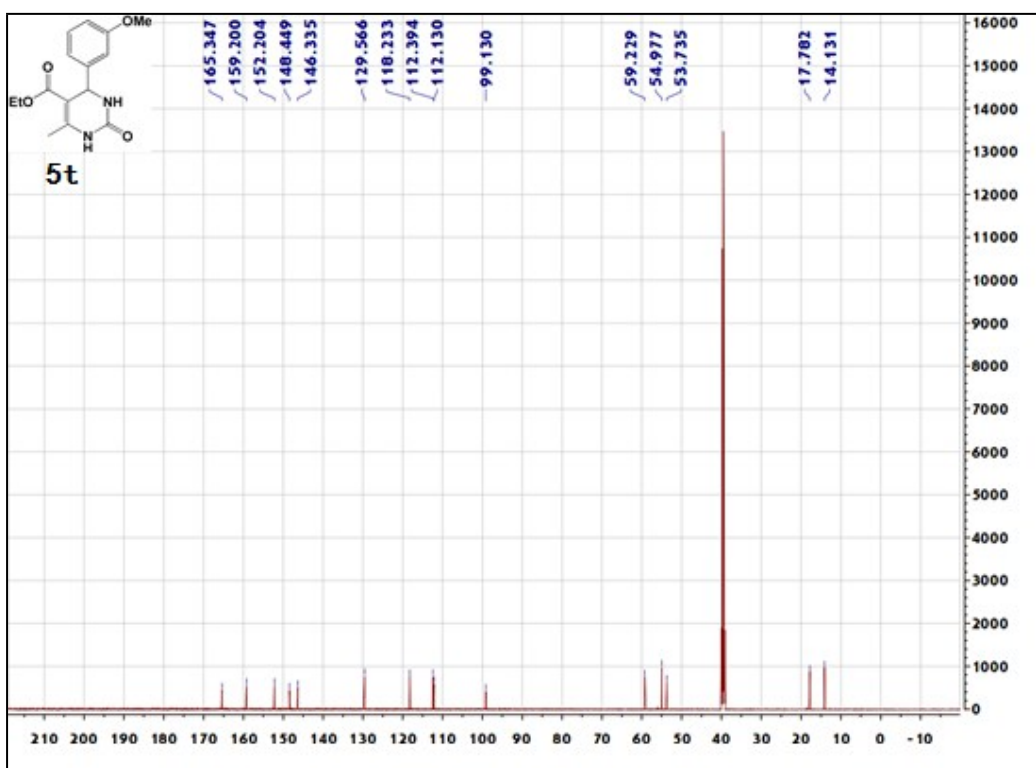

405  
406

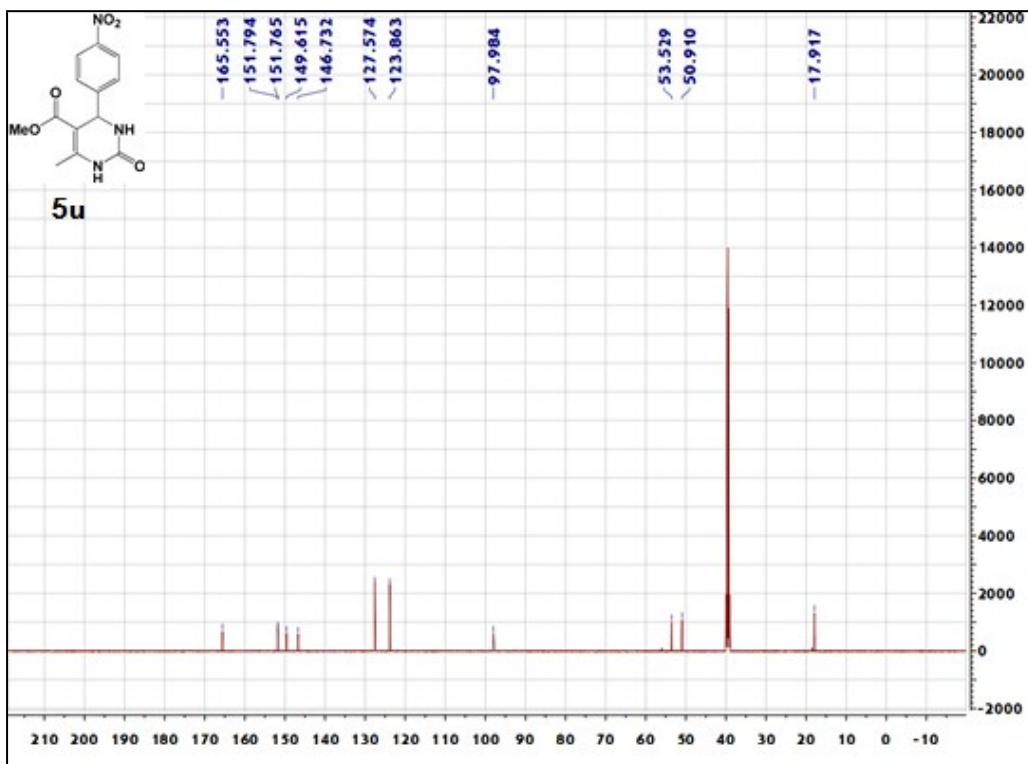

407  
408  
409  
410

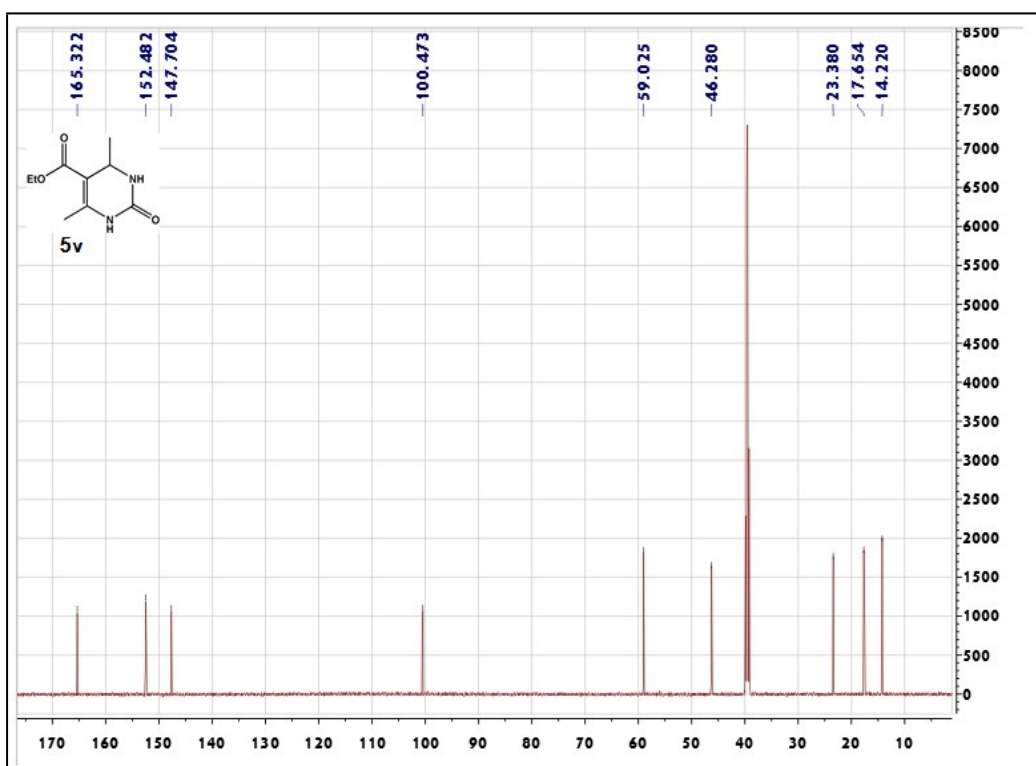

411  
412  
413  
414

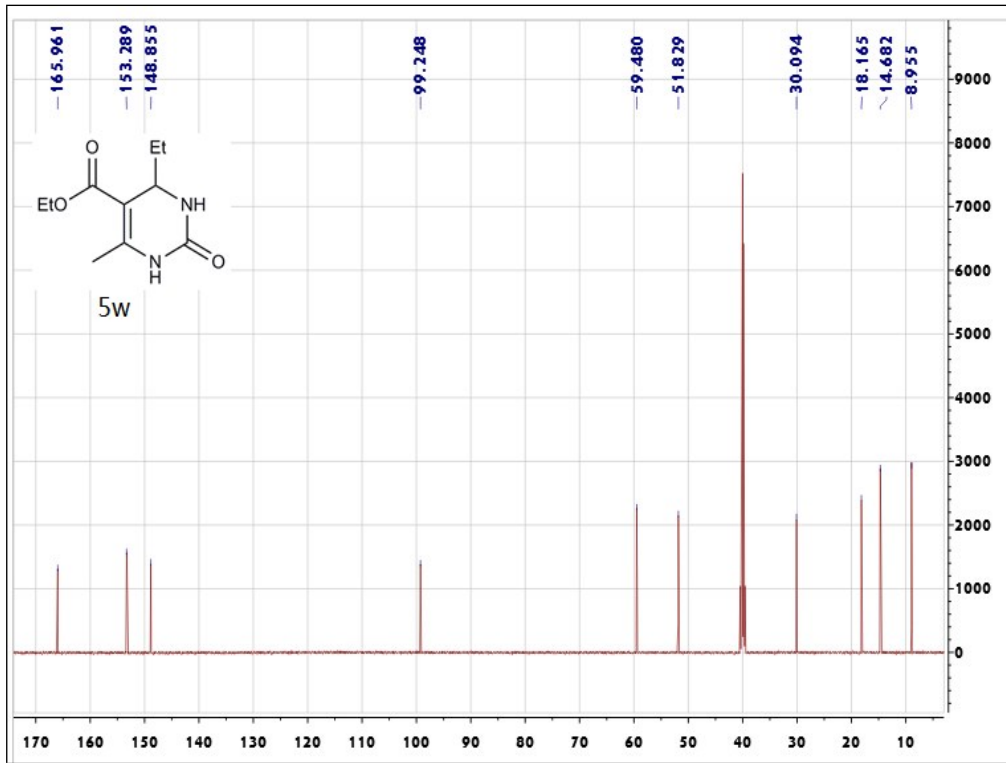

415  
416  
417  
418

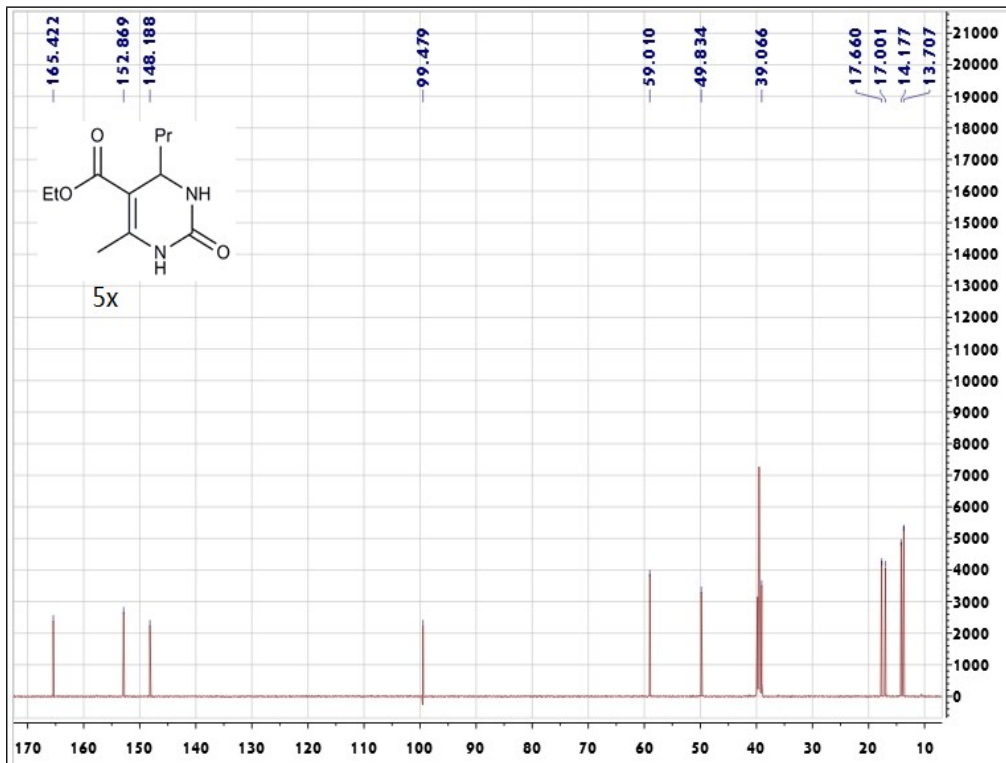

419  
420  
421  
422

423

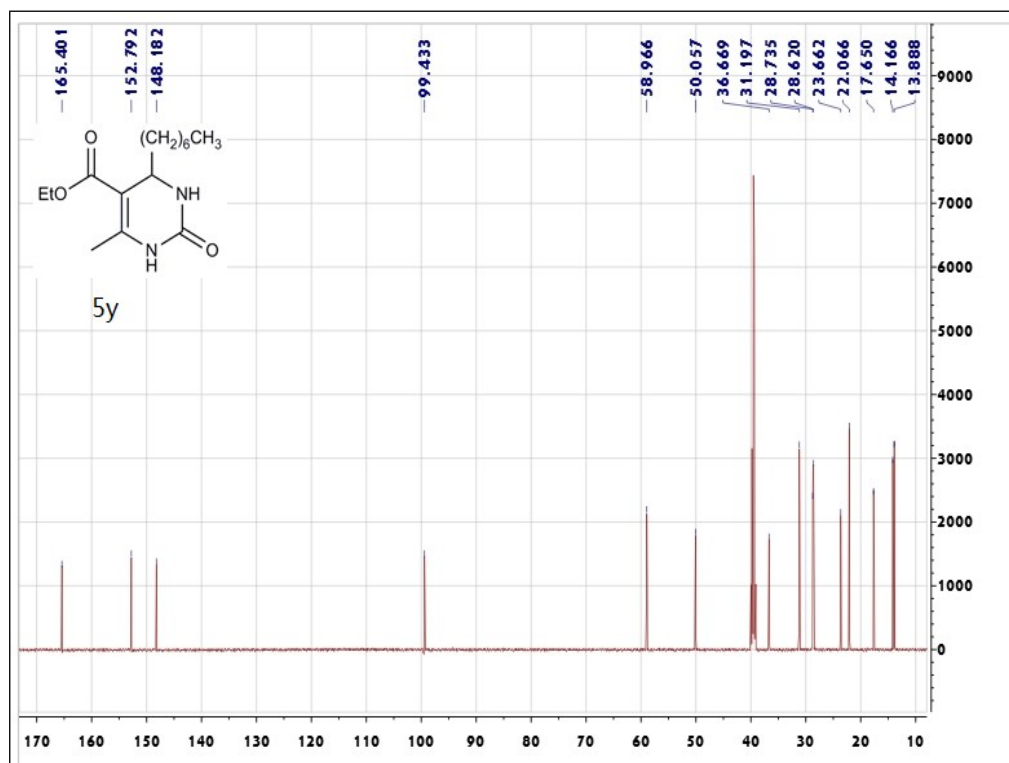

424

425

426

427

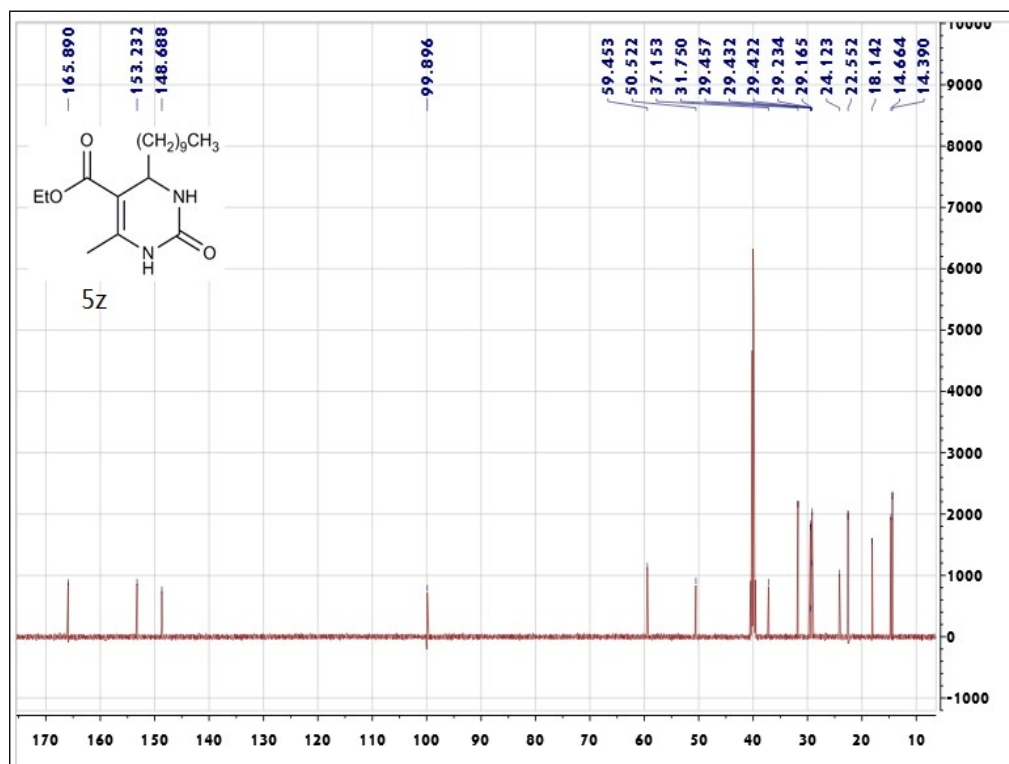

428

429

430

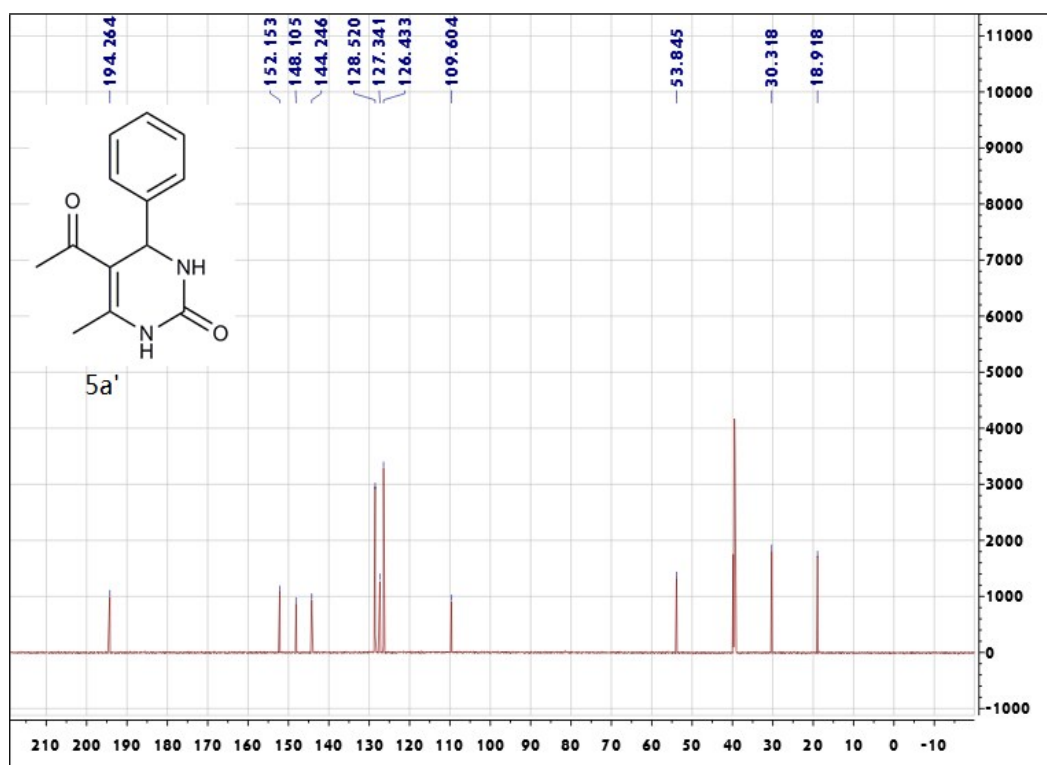

431

432

433

434

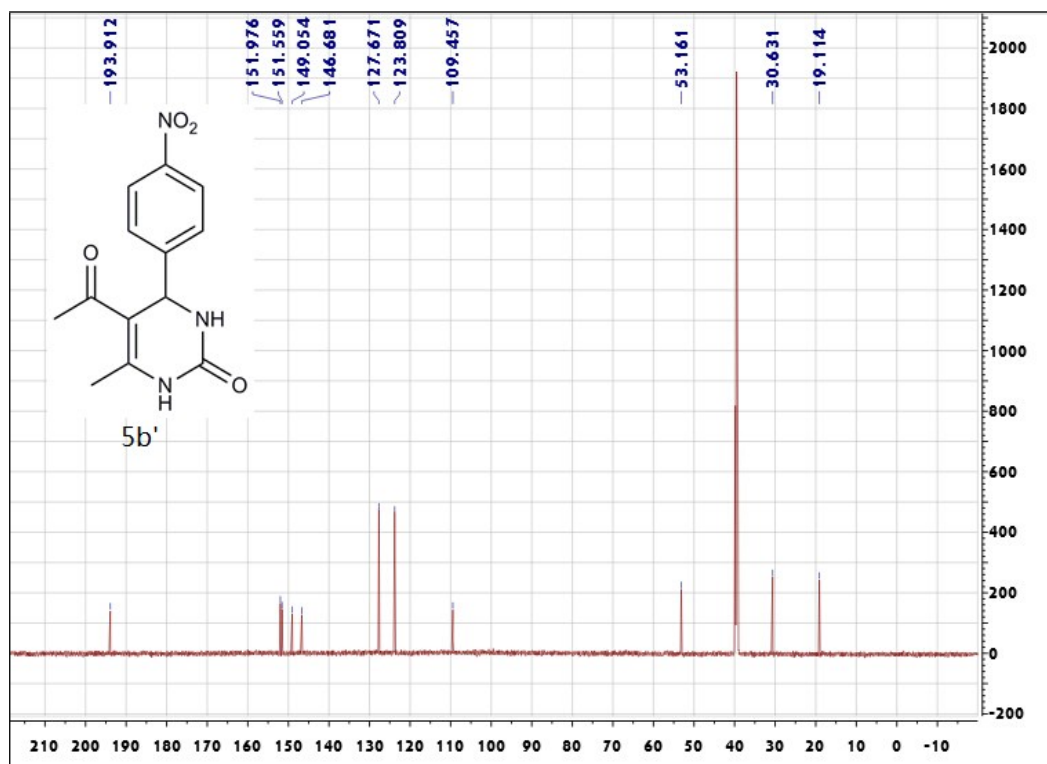

435

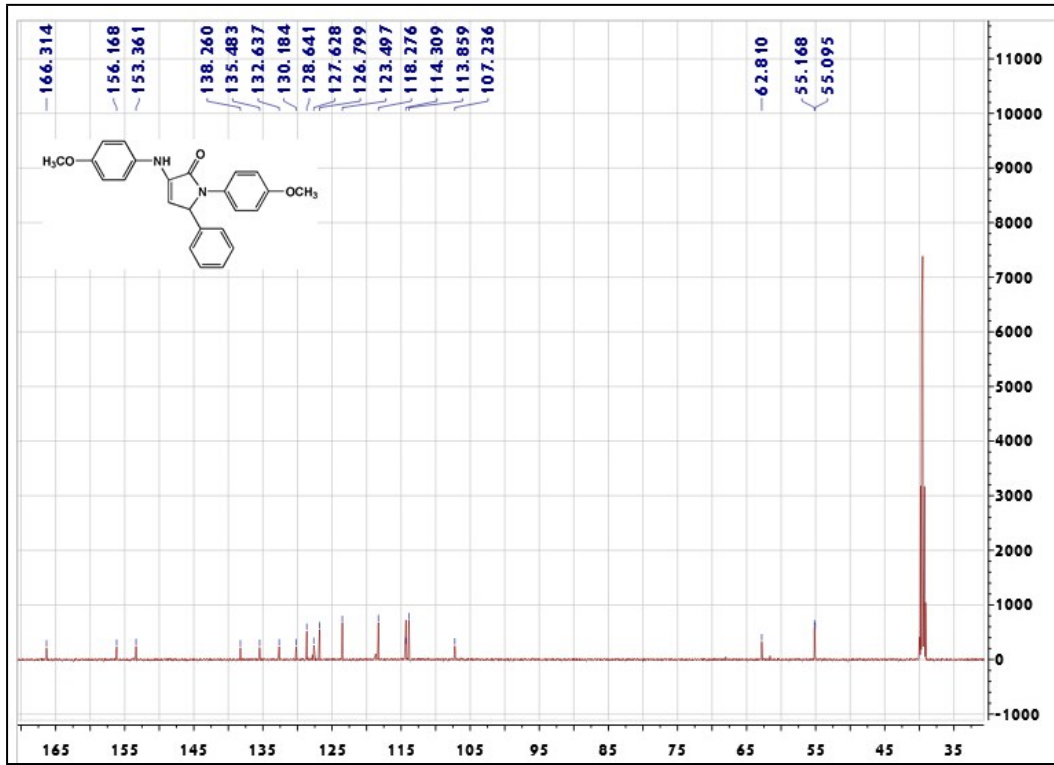

436

437

438

439

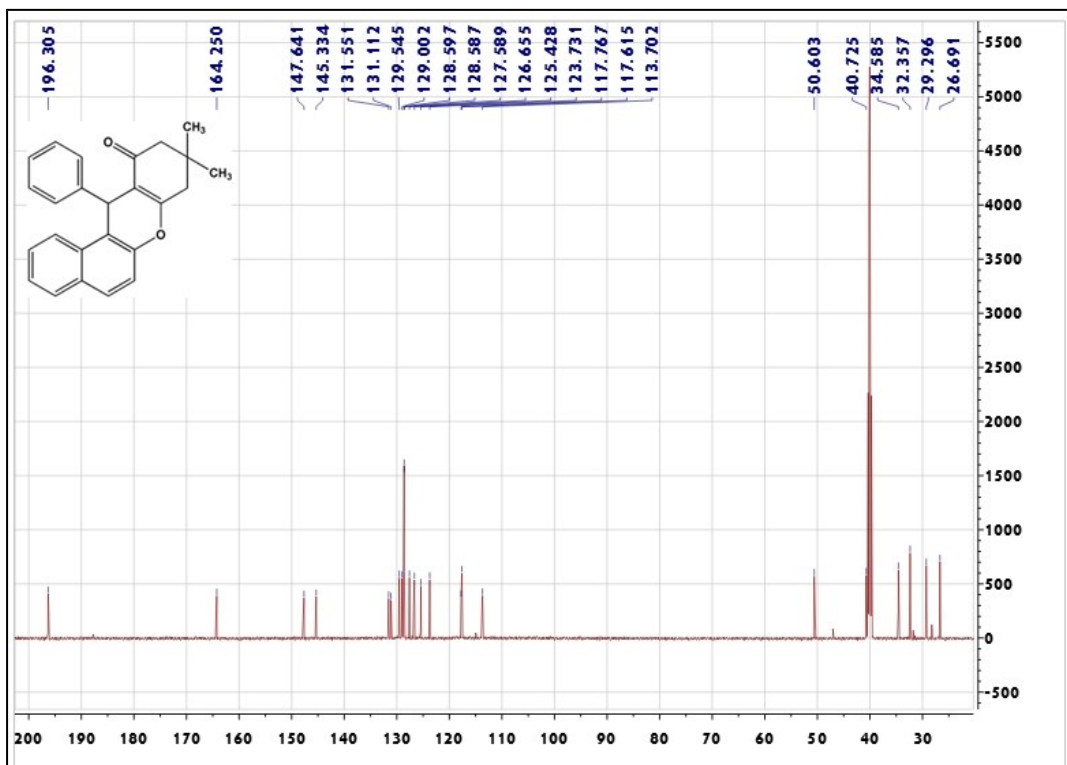

440

441

442 **2D NMR of 5v-5z**

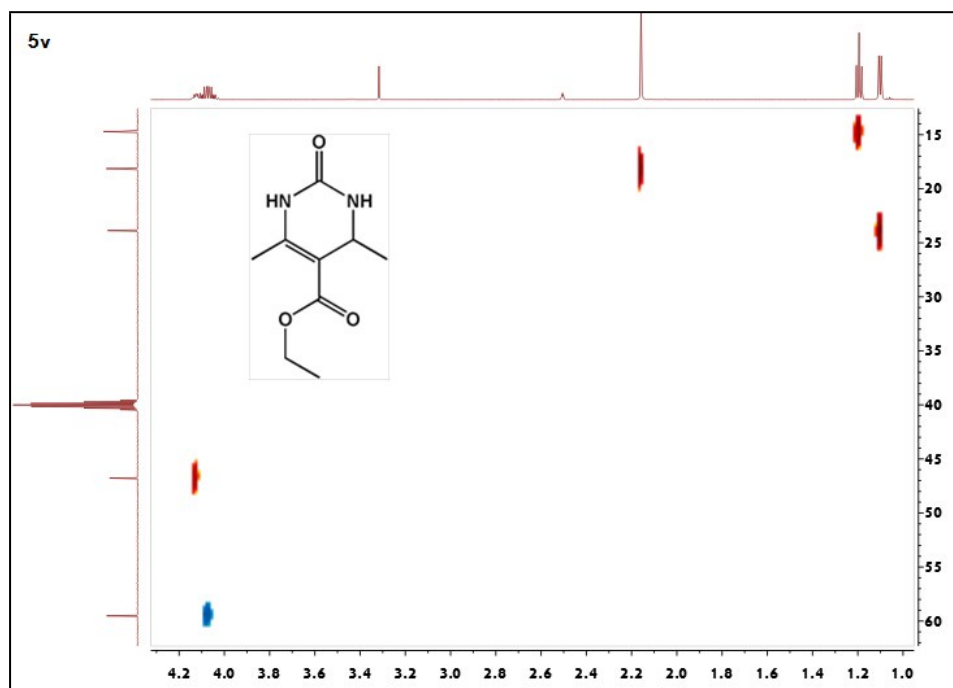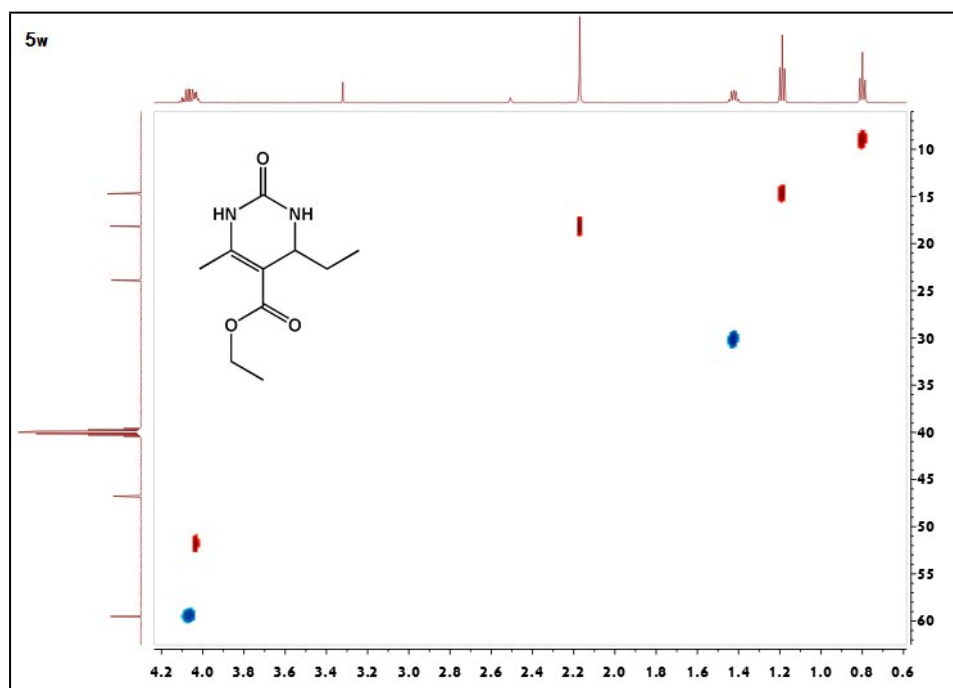

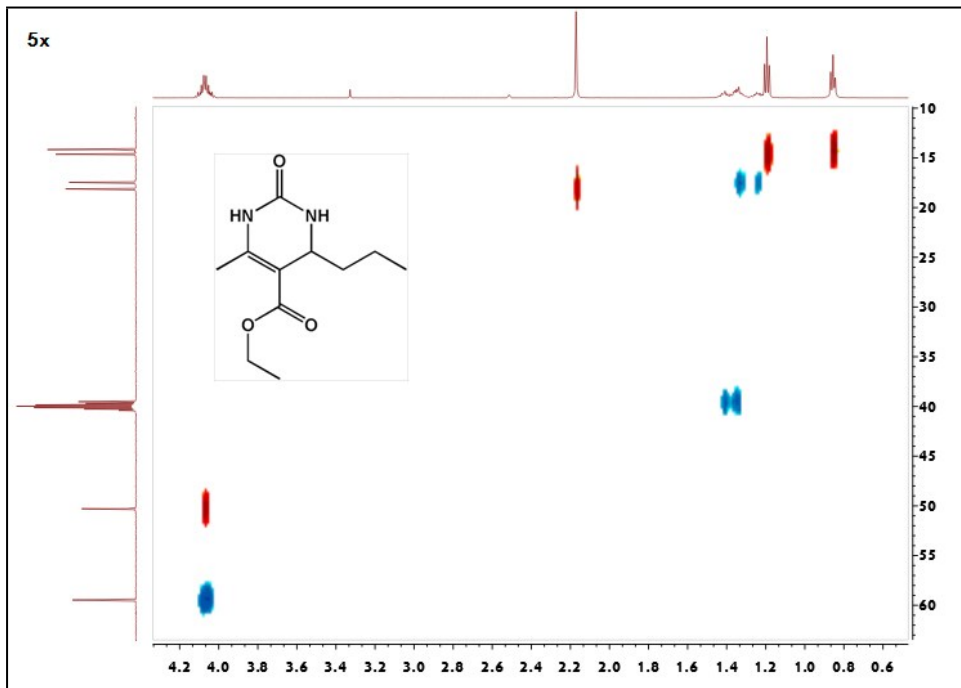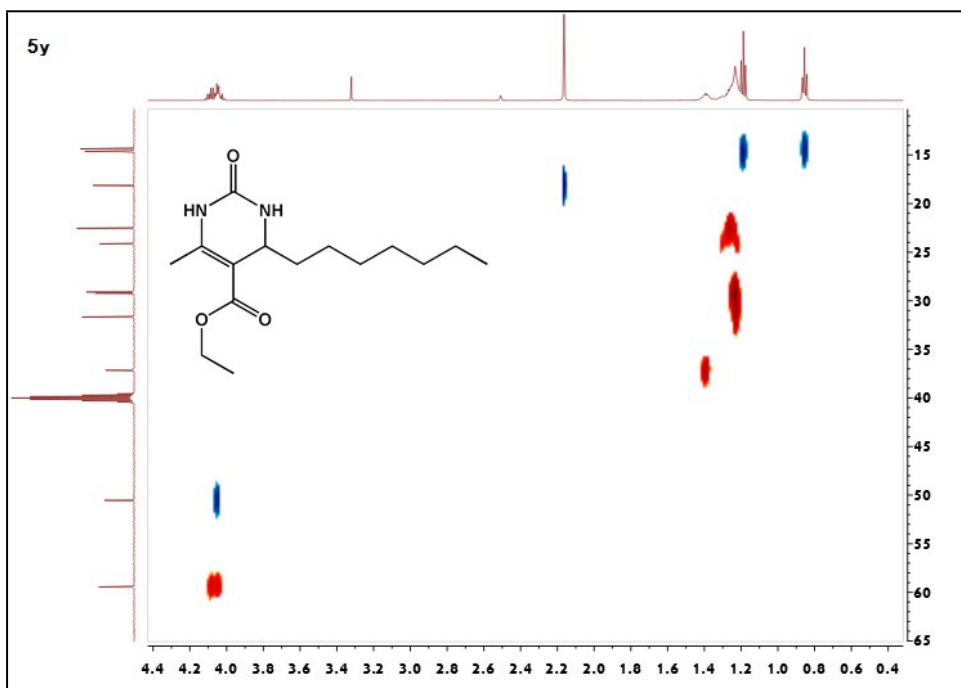



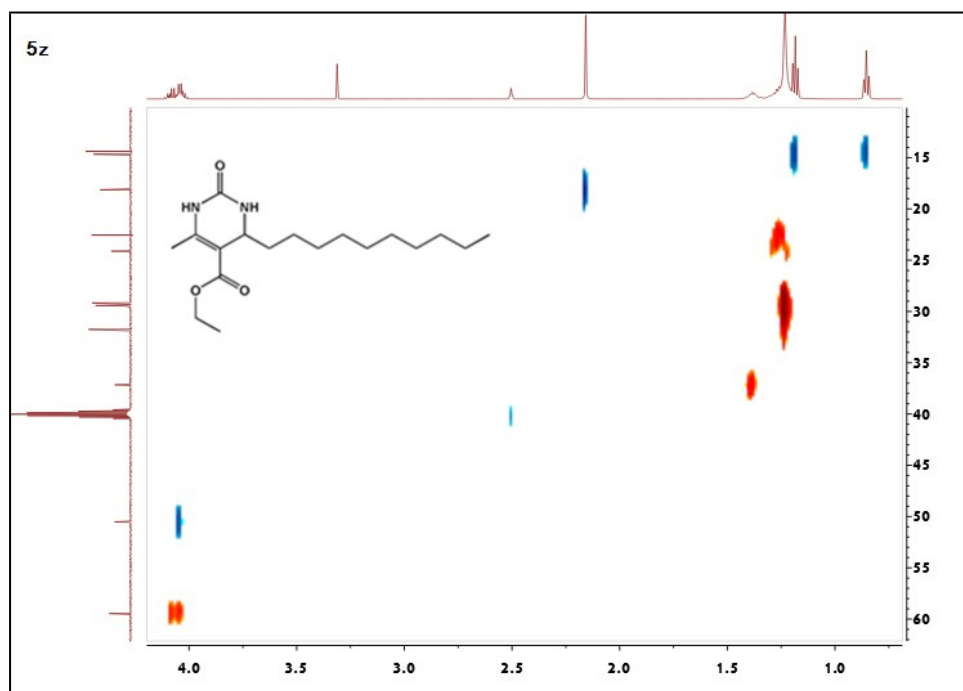

454

455

456

457

458

459

460

461

462

463

464

465

466

467

468

469

470

471

472

473 **Spectroscopic data for all compounds**

474 **5-Ethoxycarbonyl-6-methyl-4-phenyl-3,4-dihydropyrimidin-2(1H)-one (5a)**

475 <sup>1</sup>H NMR (DMSO-*d*<sub>6</sub>, 600 MHz, Me<sub>4</sub>Si, 25 °C): δ ppm = 9.17 (brs, 1H, NH), 7.72 (brs, 1H, NH),  
476 7.33-7.23 (m, 5H, Ar-H), 5.14 (d, *J* = 3.0 Hz, 1H, CH), 3.98 (q, *J* = 7.2 Hz, 2H, OCH<sub>2</sub>CH<sub>3</sub>), 2.25  
477 (s, 3H, CH<sub>3</sub>), 1.08 (t, *J* = 7.2 Hz, 3H, OCH<sub>2</sub>CH<sub>3</sub>); <sup>13</sup>C NMR (151 MHz, DMSO-*d*<sub>6</sub>, δ ppm): 165.31,  
478 152.09, 148.32, 144.84, 128.36, 127.23, 126.22, 99.25, 59.16, 53.94, 17.76, 14.06; IR (KBr): ν  
479 (cm<sup>-1</sup>) 3245, 3115, 2979, 1725, 1702, 1649; mp (°C): 208-210.

480 **5-Ethoxycarbonyl-4-(4-hydroxyphenyl)-6-methyl-3,4-dihydropyrimidin-2(1H)-one (5b)**

481 <sup>1</sup>H NMR (DMSO-*d*<sub>6</sub>, 600 MHz, Me<sub>4</sub>Si, 25 °C): δ ppm = 9.32 (s, 1H, OH), 9.10 (brs, 1H, NH),  
482 7.61 (brs, 1H, NH), 7.02 (d, *J* = 9.0 Hz, 2H, Ar-H), 6.68 (d, *J* = 8.4 Hz, 2H, Ar-H), 5.04 (d, *J* = 3.6  
483 Hz, 1H, CH), 3.97 (q, *J* = 7.2 Hz, 2H, OCH<sub>2</sub>CH<sub>3</sub>), 2.23 (s, 3H, CH<sub>3</sub>), 1.09 (t, *J* = 7.2 Hz, 3H,  
484 OCH<sub>2</sub>CH<sub>3</sub>); <sup>13</sup>C NMR (151 MHz, DMSO-*d*<sub>6</sub>, δ ppm): 165.03, 151.97, 151.71, 149.36, 146.70,  
485 127.63, 123.81, 98.17, 59.37, 53.67, 17.85, 14.04; IR (KBr): ν (cm<sup>-1</sup>) 3284, 3111, 2973, 1691,  
486 1652, 1606; mp (°C): 232-234.

487 **5-Ethoxycarbonyl-6-methyl-4-(4-nitrophenyl)-3,4-dihydropyrimidin-2(1H)-one (5c)**

488 <sup>1</sup>H NMR (DMSO-*d*<sub>6</sub>, 600 MHz, Me<sub>4</sub>Si, 25 °C): δ ppm = 9.34 (brs, 1H, NH), 8.22 (d, *J* = 9.0 Hz,  
489 2H, Ar-H), 7.88 (brs, 1H, NH), 7.50 (d, *J* = 9.0 Hz, 2H, Ar-H), 5.27 (d, *J* = 3.6 Hz, 1H, CH), 3.99  
490 (q, *J* = 7.2 Hz, 2H, OCH<sub>2</sub>CH<sub>3</sub>), 2.27 (s, 3H, CH<sub>3</sub>), 1.09 (t, *J* = 7.2 Hz, 3H, OCH<sub>2</sub>CH<sub>3</sub>); <sup>13</sup>C NMR  
491 (151 MHz, DMSO-*d*<sub>6</sub>, δ ppm): 165.05, 152.00, 151.74, 149.40, 146.71, 127.66, 123.85, 98.17,  
492 59.40, 53.68, 17.89, 14.06; IR (KBr): ν (cm<sup>-1</sup>) 3225, 3118, 2981, 1705, 1641, 1522; mp (°C): 210-  
493 212.

494 **5-Ethoxycarbonyl-6-methyl-4-phenyl-3,4-dihydropyrimidin-2(1H)-thione (5d)**

495 <sup>1</sup>H NMR (DMSO-*d*<sub>6</sub>, 600 MHz, Me<sub>4</sub>Si, 25 °C): δ ppm = 10.33 (brs, 1H, NH), 9.65 (brs, 1H, NH),  
496 7.36-7.21 (m, 5H, Ar-H), 5.17 (d, *J* = 3.6 Hz, 1H, CH), 4.01 (q, *J* = 7.2 Hz, 2H, OCH<sub>2</sub>CH<sub>3</sub>), 2.29  
497 (s, 3H, CH<sub>3</sub>), 1.10 (t, *J* = 7.2 Hz, 3H, OCH<sub>2</sub>CH<sub>3</sub>); <sup>13</sup>C NMR (151 MHz, DMSO-*d*<sub>6</sub>, δ ppm): 174.22,  
498 165.12, 145.04, 143.49, 128.57, 127.69, 126.38, 100.70, 59.60, 54.04, 17.17, 14.02; IR (KBr): ν  
499 (cm<sup>-1</sup>) 3248, 3113, 2954, 1716, 1684, 1652; mp (°C): 205-206.

500 **5-Ethoxycarbonyl-4-(4-methoxyphenyl)-6-methyl-3,4-dihydropyrimidin-2(1H)-one (5e)**

501 <sup>1</sup>H NMR (DMSO-*d*<sub>6</sub>, 600 MHz, Me<sub>4</sub>Si, 25 °C): δ ppm = 9.14 (brs, 1H, NH), 7.65 (brs, 1H, NH),  
502 7.14 (d, *J* = 8.4 Hz, 2H, Ar-H), 6.87 (d, *J* = 8.4 Hz, 2H, Ar-H), 5.09 (d, *J* = 3.0 Hz, 1H, CH), 3.98

503 (q,  $J = 7.2$  Hz, 2H, OCH<sub>2</sub>CH<sub>3</sub>), 3.72 (s, 3H, OCH<sub>3</sub>), 2.24 (s, 3H, CH<sub>3</sub>), 1.10 (t,  $J = 7.2$  Hz, 3H,  
504 OCH<sub>2</sub>CH<sub>3</sub>); <sup>13</sup>C NMR (151 MHz, DMSO-*d*<sub>6</sub>,  $\delta$  ppm): 165.36, 158.42, 152.13, 147.99, 137.04,  
505 127.37, 113.69, 99.56, 59.14, 55.05, 53.32, 17.75, 14.10; IR (KBr):  $\nu$  (cm<sup>-1</sup>) 3244, 3111, 2956,  
506 1706, 1650, 1614; mp (°C): 203-205.

507 **5-Methoxycarbonyl-6-methyl-4-phenyl-3,4-dihydropyrimidin-2(1H)-one (5f)**

508 <sup>1</sup>H NMR (DMSO-*d*<sub>6</sub>, 600 MHz, Me<sub>4</sub>Si, 25 °C):  $\delta$  ppm = 9.21 (brs, 1H, NH), 7.74 (brs, 1H, NH),  
509 7.33-7.23 (m, 5H, Ar-H), 5.14 (d,  $J = 3.6$  Hz, 1H, CH), 3.53 (s, 3H, OCH<sub>3</sub>), 2.25 (s, 3H, CH<sub>3</sub>); <sup>13</sup>C  
510 NMR (151 MHz, DMSO-*d*<sub>6</sub>,  $\delta$  ppm): 165.82, 152.14, 148.64, 144.66, 128.44, 127.27, 126.15,  
511 99.00, 53.77, 50.79, 17.83; IR (KBr):  $\nu$  (cm<sup>-1</sup>) 3332, 3224, 3107, 2947, 1706, 1668; mp (°C): 212-  
512 213.

513 **5-Methoxycarbonyl-4-(4-methoxyphenyl)-6-methyl-3,4-dihydropyrimidin-2(1H)-one (5g)**

514 <sup>1</sup>H NMR (DMSO-*d*<sub>6</sub>, 600 MHz, Me<sub>4</sub>Si, 25 °C):  $\delta$  ppm = 9.17 (brs, 1H, NH), 7.68 (brs, 1H, NH),  
515 7.14 (d,  $J = 9.0$  Hz, 2H, Ar-H), 6.87 (d,  $J = 8.4$  Hz, 2H, Ar-H), 5.09 (d,  $J = 3.6$  Hz, 1H, CH), 3.72  
516 (s, 3H, OCH<sub>3</sub>), 3.52 (s, 3H, OCH<sub>3</sub>), 2.24 (s, 3H, CH<sub>3</sub>); <sup>13</sup>C NMR (151 MHz, DMSO-*d*<sub>6</sub>,  $\delta$  ppm):  
517 165.85, 158.45, 152.15, 148.32, 136.84, 127.32, 113.76, 99.28, 55.05, 53.18, 50.76, 17.80; IR  
518 (KBr):  $\nu$  (cm<sup>-1</sup>) 3246, 3111, 2949, 2840, 1720, 1655; mp (°C): 197-200.

519 **5-Ethoxycarbonyl-4-(4-methoxyphenyl)-6-methyl-3,4-dihydropyrimidin-2(1H)-thione (5h)**

520 <sup>1</sup>H NMR (DMSO-*d*<sub>6</sub>, 600 MHz, Me<sub>4</sub>Si, 25 °C):  $\delta$  ppm = 10.28 (brs, 1H, NH), 9.59 (brs, 1H, NH),  
521 7.13 (d,  $J = 8.4$  Hz, 2H, Ar-H), 6.90 (d,  $J = 8.4$  Hz, 2H, Ar-H), 5.11 (d,  $J = 3.6$  Hz, 1H, CH), 4.00  
522 (q,  $J = 7.2$  Hz, 2H, OCH<sub>2</sub>CH<sub>3</sub>), 3.72 (s, 3H, OCH<sub>3</sub>), 2.28 (s, 3H, CH<sub>3</sub>), 1.10 (t,  $J = 7.2$  Hz, 3H,  
523 OCH<sub>2</sub>CH<sub>3</sub>); <sup>13</sup>C NMR (151 MHz, DMSO-*d*<sub>6</sub>,  $\delta$  ppm): 174.02, 165.15, 158.73, 144.73, 135.70,  
524 127.60, 113.86, 100.97, 59.54, 55.10, 53.45, 17.14, 14.04; IR (KBr):  $\nu$  (cm<sup>-1</sup>) 3313, 3172, 2984,  
525 1669, 1572, 1458; mp (°C): 151-153.

526 **5-Methoxycarbonyl-6-methyl-4-phenyl-3,4-dihydropyrimidin-2(1H)-thione (5i)**

527 <sup>1</sup>H NMR (DMSO-*d*<sub>6</sub>, 600 MHz, Me<sub>4</sub>Si, 25 °C):  $\delta$  ppm = 10.35 (brs, 1H, NH), 9.67 (brs, 1H, NH),  
528 7.36-7.21 (m, 5H, Ar-H), 5.18 (d,  $J = 3.6$  Hz, 1H, CH), 3.56 (s, 3H, OCH<sub>3</sub>), 2.30 (s, 3H, CH<sub>3</sub>); <sup>13</sup>C  
529 NMR (151 MHz, DMSO-*d*<sub>6</sub>,  $\delta$  ppm): 174.28, 165.64, 145.31, 143.30, 128.63, 127.71, 126.32,  
530 100.45, 53.91, 51.11, 17.23; IR (KBr) :  $\nu$  (cm<sup>-1</sup>) 3313, 3184, 3000, 1667, 1575, 1448; mp (°C):  
531 226-228.

532 **4-(4-Hydroxyphenyl)-5-methoxycarbonyl-6-methyl-3,4-dihydropyrimidin-2(1H)-thione (5j)**

533 <sup>1</sup>H NMR (DMSO-*d*<sub>6</sub>, 600 MHz, Me<sub>4</sub>Si, 25 °C): δ ppm = 10.26 (brs, 1H, NH), 9.56 (brs, 1H, NH),  
534 9.42 (s, 1H, OH), 7.01 (d, *J* = 8.4 Hz, 2H, Ar-H), 6.71 (d, *J* = 8.4 Hz, 2H, Ar-H), 5.06 (d, *J* = 3.6  
535 Hz, 1H, CH), 3.54 (s, 3H, OCH<sub>3</sub>), 2.28 (s, 3H, CH<sub>3</sub>); <sup>13</sup>C NMR (151 MHz, DMSO-*d*<sub>6</sub>, δ ppm):  
536 173.90, 165.71, 156.93, 144.82, 133.89, 127.58, 115.21, 100.81, 53.42, 51.04, 17.19; IR (KBr): ν  
537 (cm<sup>-1</sup>) 3310, 3124, 1665, 1567, 1448, 1341, 1192; mp (°C): 246-248.

538 **5-Ethoxycarbonyl-4-(4-methylphenyl)-6-methyl-3,4-dihydropyrimidin-2(1H)-one (5k)**

539 <sup>1</sup>H NMR (DMSO-*d*<sub>6</sub>, 600 MHz, Me<sub>4</sub>Si, 25 °C): δ ppm = 9.14 (brs, 1H, NH), 7.67 (brs, 1H, NH),  
540 7.12 (s, 4H, Ar-H), 5.10 (d, *J* = 3.6 Hz, 1H, CH), 3.98 (q, *J* = 7.2 Hz, 2H, OCH<sub>2</sub>CH<sub>3</sub>), 2.26 (s, 3H,  
541 CH<sub>3</sub>), 2.24 (s, 3H, CH<sub>3</sub>), 1.10 (t, *J* = 7.2 Hz, 3H, OCH<sub>2</sub>CH<sub>3</sub>); <sup>13</sup>C NMR (151 MHz, DMSO-*d*<sub>6</sub>, δ  
542 ppm): 165.34, 152.15, 148.11, 141.94, 136.34, 128.86, 126.12, 99.41, 59.14, 53.62, 20.63, 17.74,  
543 14.09; IR (KBr): ν (cm<sup>-1</sup>) 3246, 3115, 2972, 1716, 1644, 1460; mp (°C): 216-218.

544 **5-Methoxycarbonyl-4-(4-methylphenyl)-6-methyl-3,4-dihydropyrimidin-2(1H)-one (5l)**

545 <sup>1</sup>H NMR (DMSO-*d*<sub>6</sub>, 600 MHz, Me<sub>4</sub>Si, 25 °C): δ ppm = 9.17 (brs, 1H, NH), 7.69 (brs, 1H, NH),  
546 7.11 (s, 4H, Ar-H), 5.10 (d, *J* = 3.6 Hz, 1H, CH), 3.52 (s, 3H, OCH<sub>3</sub>), 2.26 (s, 3H, CH<sub>3</sub>), 2.24 (s,  
547 3H, CH<sub>3</sub>); <sup>13</sup>C NMR (151 MHz, DMSO-*d*<sub>6</sub>, δ ppm): 165.84, 152.17, 148.44, 141.76, 136.40, 128.94,  
548 126.07, 99.15, 53.49, 50.74, 20.63, 17.80; IR (KBr): ν (cm<sup>-1</sup>) 3242, 3113, 2934, 1703, 1644, 1514;  
549 mp (°C): 234-236.

550 **5-Ethoxycarbonyl-4-(4-hydroxyphenyl-3-methoxyphenyl)-6-methyl-3,4-dihydropyrimidin-  
551 2(1H)-one (5m)**

552 <sup>1</sup>H NMR (DMSO-*d*<sub>6</sub>, 600 MHz, Me<sub>4</sub>Si, 25 °C): δ ppm = 9.10 (s, 1H, OH), 8.89 (brs, 1H, NH),  
553 7.61 (brs, 1H, NH), 6.80-6.60 (m, 3H, Ar-H), 5.06 (d, *J* = 3.0 Hz, 1H, CH), 3.99 (q, *J* = 7.2 Hz,  
554 2H, OCH<sub>2</sub>CH<sub>3</sub>), 3.72 (s, 3H, OCH<sub>3</sub>), 2.23 (s, 3H, CH<sub>3</sub>), 1.11 (t, *J* = 7.2 Hz, 3H, OCH<sub>2</sub>CH<sub>3</sub>); <sup>13</sup>C  
555 NMR (151 MHz, DMSO-*d*<sub>6</sub>, δ ppm): 165.44, 152.21, 147.86, 147.24, 145.78, 135.91, 118.28,  
556 115.26, 110.89, 99.55, 59.11, 55.57, 53.55, 17.73, 14.15; IR (KBr): ν (cm<sup>-1</sup>) 3245, 3114, 2948,  
557 1717, 1647, 1433; mp (°C): 225-226.

558 **4-(4-Chlorophenyl)-5-ethoxycarbonyl-6-methyl-3,4-dihydropyrimidin-2(1H)-one (5n)**

559 <sup>1</sup>H NMR (DMSO-*d*<sub>6</sub>, 600 MHz, Me<sub>4</sub>Si, 25 °C) : δ ppm = 9.23 (brs, 1H, NH), 7.76 (brs, 1H, NH),  
560 7.39 (d, *J* = 8.4 Hz, 2H, Ar-H), 7.25 (d, *J* = 8.4 Hz, 2H, Ar-H), 5.14 (d, *J* = 3.0 Hz, 1H, CH), 3.98  
561 (q, *J* = 7.2 Hz, 2H, OCH<sub>2</sub>CH<sub>3</sub>), 2.25 (s, 3H, CH<sub>3</sub>), 1.09 (t, *J* = 7.2 Hz, 3H, OCH<sub>2</sub>CH<sub>3</sub>); <sup>13</sup>C NMR  
562 (151 MHz, DMSO-*d*<sub>6</sub>, δ ppm): 165.19, 151.91, 148.70, 143.78, 131.77, 128.38, 128.17, 98.83,

563 59.25, 53.42, 17.79, 14.07; IR (KBr):  $\nu$  (cm<sup>-1</sup>) 3241, 3114, 2968, 1713, 1645, 1469; mp (°C): 215-  
564 217.

565 **4-(4-Chlorophenyl)-5-methoxycarbonyl-6-methyl-3,4-dihydropyrimidin-2(1H)-one (5o)**

566 <sup>1</sup>H NMR (DMSO-*d*<sub>6</sub>, 600 MHz, Me<sub>4</sub>Si, 25 °C):  $\delta$  ppm = 9.27 (brs, 1H, NH), 7.78 (brs, 1H, NH),  
567 7.39 (d, *J* = 8.4 Hz, 2H, Ar-H), 7.25 (d, *J* = 9.0 Hz, 2H, Ar-H), 5.14 (d, *J* = 3.6 Hz, 1H, CH), 3.53  
568 (s, 3H, OCH<sub>3</sub>), 2.25 (s, 3H, CH<sub>3</sub>); <sup>13</sup>C NMR (151 MHz, DMSO-*d*<sub>6</sub>,  $\delta$  ppm): 165.70, 151.96,  
569 148.98, 143.59, 131.82, 128.44, 128.11, 98.61, 53.27, 50.82, 17.85; IR (KBr):  $\nu$  (cm<sup>-1</sup>) 3362, 3226,  
570 3108, 2964, 1722, 1630; mp (°C): 209-212.

571 **4-(4-Bromophenyl)-5-ethoxycarbonyl-6-methyl-3,4-dihydropyrimidin-2(1H)-one (5p)**

572 <sup>1</sup>H NMR (DMSO-*d*<sub>6</sub>, 600 MHz, Me<sub>4</sub>Si, 25 °C):  $\delta$  ppm = 9.24 (brs, 1H, NH), 7.77 (brs, 1H, NH),  
573 7.53 (d, *J* = 8.4 Hz, 2H, Ar-H), 7.19 (d, *J* = 8.4 Hz, 2H, Ar-H), 5.12 (d, *J* = 3.6 Hz, 1H, CH), 3.98  
574 (q, *J* = 7.2 Hz, 2H, OCH<sub>2</sub>CH<sub>3</sub>), 2.24 (s, 3H, CH<sub>3</sub>), 1.09 (t, *J* = 7.2 Hz, 3H, OCH<sub>2</sub>CH<sub>3</sub>); <sup>13</sup>C NMR  
575 (151 MHz, DMSO-*d*<sub>6</sub>,  $\delta$  ppm): 165.18, 151.90, 148.72, 144.18, 131.30, 128.53, 120.29, 98.76,  
576 59.26, 53.48, 17.80, 14.07; IR (KBr) :  $\nu$  (cm<sup>-1</sup>) 3244, 3116, 2968, 1717, 1648, 1471; mp (°C): 223-  
577 225.

578 **4-(4-Bromophenyl)-5-methylcarbonyl-6-methyl-3,4-dihydropyrimidin-2(1H)-one (5q)**

579 <sup>1</sup>H NMR (DMSO-*d*<sub>6</sub>, 600 MHz, Me<sub>4</sub>Si, 25 °C):  $\delta$  ppm = 9.27 (brs, 1H, NH), 7.78 (brs, 1H, NH),  
580 7.52 (d, *J* = 8.4 Hz, 2H, Ar-H), 7.18 (d, *J* = 8.4 Hz, 2H, Ar-H), 5.12 (d, *J* = 3.0 Hz, 1H, CH), 3.53  
581 (s, 3H, OCH<sub>3</sub>), 2.25 (s, 3H, CH<sub>3</sub>); <sup>13</sup>C NMR (151 MHz, DMSO-*d*<sub>6</sub>,  $\delta$  ppm): 165.69, 151.94,  
582 149.00, 144.00, 131.37, 128.47, 120.35, 98.54, 53.33, 50.84, 17.85; IR (KBr):  $\nu$  (cm<sup>-1</sup>) 3363, 3222,  
583 3106, 2953, 1720, 1633; mp (°C): 225-227.

584 **4-(4-Fluorophenyl)-5-methylcarbonyl-6-methyl-3,4-dihydropyrimidin-2(1H)-one (5r)**

585 <sup>1</sup>H NMR (DMSO-*d*<sub>6</sub>, 600 MHz, Me<sub>4</sub>Si, 25 °C):  $\delta$  ppm = 9.26 (brs, 1H, NH), 7.78 (brs, 1H, NH),  
586 7.27-7.13 (m, 4H, Ar-H), 5.14 (d, *J* = 3.0 Hz, 1H, CH), 3.53 (s, 3H, OCH<sub>3</sub>), 2.25 (s, 3H, CH<sub>3</sub>); <sup>13</sup>C  
587 NMR (151 MHz, DMSO-*d*<sub>6</sub>,  $\delta$  ppm): 165.76, 162.14, 160.53, 152.02, 148.84, 140.93 (d, *J*=2.87  
588 Hz), 128.18 (d, *J* = 8.15 Hz), 115.20 (d, *J*=21.29 Hz), 98.89, 53.17, 50.84, 17.87; IR (KBr) :  $\nu$   
589 (cm<sup>-1</sup>) 3327, 3223, 3106, 2948, 1680, 1423; mp (°C): 202-203.

590 **4-(4-Fluorophenyl)-5-ethoxycarbonyl-6-methyl-3,4-dihydropyrimidin-2(1H)-one (5s)**

591 <sup>1</sup>H NMR (DMSO-*d*<sub>6</sub>, 600 MHz, Me<sub>4</sub>Si, 25 °C):  $\delta$  ppm = 9.21 (brs, 1H, NH), 7.73 (brs, 1H, NH),  
592 7.27-7.13 (m, 4H, Ar-H), 5.14 (d, *J* = 3.0 Hz, 1H, CH), 3.98 (m, 2H, OCH<sub>2</sub>CH<sub>3</sub>), 2.25 (s, 3H,

593 CH<sub>3</sub>), 1.09 (t, *J* = 7.2 Hz, 3H, OCH<sub>2</sub>CH<sub>3</sub>); <sup>13</sup>C NMR (151 MHz, DMSO-*d*<sub>6</sub>, δ ppm): 165.23,  
594 162.10, 160.49, 151.94, 148.51, 141.12 (d, *J* = 3.02 Hz), 128.23 (d, *J* = 8.15 Hz), 115.10 (d, *J* =  
595 21.29 Hz), 99.11, 59.20, 53.33, 17.78, 14.06; IR (KBr): ν (cm<sup>-1</sup>) 3243, 3120, 2971, 1717, 1646,  
596 1461; mp (°C): 184-186.

597 **5-Ethoxycarbonyl-4-(3-methoxyphenyl)-6-methyl-3,4-dihydropyrimidin-2(1H)-one (5t)**

598 <sup>1</sup>H NMR (DMSO-*d*<sub>6</sub>, 600 MHz, Me<sub>4</sub>Si, 25 °C): δ ppm = 9.19 (brs, 1H, NH), 7.73 (brs, 1H, NH),  
599 7.24 (t, 1H, *J* = 7.8 Hz, Ar-H), 6.80 (m, 3H, Ar-H), 5.11 (d, *J* = 3.0 Hz, 1H, CH), 3.99 (q, *J* = 7.2  
600 Hz, 2H, OCH<sub>2</sub>CH<sub>3</sub>), 3.72 (s, 3H, OCH<sub>3</sub>), 2.24 (s, 3H, CH<sub>3</sub>), 1.11 (t, *J* = 7.2 Hz, 3H, OCH<sub>2</sub>CH<sub>3</sub>);  
601 <sup>13</sup>C NMR (151 MHz, DMSO-*d*<sub>6</sub>, δ ppm): 165.35, 159.20, 152.20, 148.45, 146.34, 129.57, 118.23,  
602 112.39, 112.13, 99.13, 59.23, 54.98, 53.74, 17.78, 14.13; IR (KBr): ν (cm<sup>-1</sup>) 3254, 3109, 2952,  
603 1704, 1638, 1451; mp (°C): 229-231.

604 **5-Methylcarbonyl-6-methyl-4-(4-nitrophenyl)-3,4-dihydropyrimidin-2(1H)-one (5u)**

605 <sup>1</sup>H NMR (DMSO-*d*<sub>6</sub>, 600 MHz, Me<sub>4</sub>Si, 25 °C): δ ppm = 9.37 (brs, 1H, NH), 8.21 (d, *J* = 8.4 Hz,  
606 2H, Ar-H), 7.90 (brs, 1H, NH), 7.50 (d, *J* = 8.4 Hz, 2H, Ar-H), 5.27 (d, *J* = 3.6 Hz, 1H, CH), 3.54  
607 (s, 3H, OCH<sub>3</sub>), 2.27 (s, 3H, CH<sub>3</sub>); <sup>13</sup>C NMR (151 MHz, DMSO-*d*<sub>6</sub>, δ ppm): 165.55, 151.79,  
608 151.77, 149.62, 146.73, 127.57, 123.86, 97.98, 53.53, 50.91, 17.92; IR (KBr): ν (cm<sup>-1</sup>) 3364, 3223,  
609 3113, 2958, 1714, 1638, 1516; mp (°C): 241-243.

610 **5-Ethoxycarbonyl-4,6-dimethyl-3,4-dihydropyrimidin-2(1H)-one (5v)**

611 <sup>1</sup>H NMR (DMSO-*d*<sub>6</sub>, 600 MHz, Me<sub>4</sub>Si, 25 °C): δ ppm = 8.96 (s, 1H, NH), 7.18 (s, 1H, NH), 4.13-  
612 4.06 (m, 2H, OCH<sub>2</sub>CH<sub>3</sub>), 4.06-4.03 (m, 1H, CH), 2.15 (s, 3H, CH<sub>3</sub>), 1.19 (t, *J* = 7.2 Hz, 3H,  
613 OCH<sub>2</sub>CH<sub>3</sub>), 1.10 (d, *J* = 6.6 Hz, 3H, CH<sub>3</sub>); <sup>13</sup>C NMR (151 MHz, DMSO-*d*<sub>6</sub>, δ ppm): 165.32,  
614 152.48, 147.70, 100.47, 59.03, 46.28, 23.38, 17.65, 14.22; IR (KBr): ν (cm<sup>-1</sup>) 3251, 3116, 2978,  
615 2937, 1705, 1656; mp (°C): 288-290.

616 **5-Ethoxycarbonyl-6-methyl-4-ethyl-3,4-dihydropyrimidin-2(1H)-one (5w)**

617 <sup>1</sup>H NMR (DMSO-*d*<sub>6</sub>, 600 MHz, Me<sub>4</sub>Si, 25 °C): δ ppm = 8.91 (s, 1H, NH), 7.27 (s, 1H, NH), 4.11-  
618 4.06 (m, 2H, OCH<sub>2</sub>CH<sub>3</sub>), 4.06-4.01 (m, 1H, CH), 2.16 (s, 3H, CH<sub>3</sub>), 1.44-1.39 (m, 2H, CH<sub>2</sub>CH<sub>3</sub>),  
619 1.18 (t, *J* = 7.2 Hz, 3H, OCH<sub>2</sub>CH<sub>3</sub>), 0.79 (t, *J* = 7.2 Hz, 3H, CH<sub>2</sub>CH<sub>3</sub>); <sup>13</sup>C NMR (151 MHz,  
620 DMSO-*d*<sub>6</sub>, δ ppm): 165.96, 153.29, 148.86, 99.25, 59.48, 51.83, 30.09, 18.17, 14.68, 9.00; IR  
621 (KBr): ν (cm<sup>-1</sup>) 3249, 3121, 2961, 2936, 1724, 1704; mp (°C): 191-192.

622 **5-Ethoxycarbonyl-6-methyl-4-propyl-3,4-dihydropyrimidin-2(1H)-one (5x)**

623 <sup>1</sup>H NMR (DMSO-*d*<sub>6</sub>, 600 MHz, Me<sub>4</sub>Si, 25 °C): δ ppm= 8.92 (s, 1H, NH), 7.32 (s, 1H, NH), 4.11-  
624 4.06 (m, 2H, OCH<sub>2</sub>CH<sub>3</sub>), 4.06-4.01 (m, 1H, CH), 2.16 (s, 3H, CH<sub>3</sub>), 1.43-1.20 (m, 4H,  
625 (CH<sub>2</sub>)<sub>2</sub>CH<sub>3</sub>), 1.18 (t, *J* = 7.2 Hz, 3H, OCH<sub>2</sub>CH<sub>3</sub>), 0.84 (t, *J* = 7.2 Hz, 3H, (CH<sub>2</sub>)<sub>2</sub>CH<sub>3</sub>); <sup>13</sup>C NMR  
626 (151 MHz, DMSO-*d*<sub>6</sub>, δ ppm): 165.42, 152.87, 148.19, 99.48, 59.01, 49.83, 39.07, 17.66, 17.00,  
627 14.18, 13.71; IR (KBr): ν (cm<sup>-1</sup>) 3251, 3120, 2958, 2935, 1721, 1704; mp (°C): 192-193.

628 **5-Ethoxycarbonyl-6-methyl-4-heptyl-3,4-dihydropyrimidin-2(1H)-one (5y)**

629 <sup>1</sup>H NMR (DMSO-*d*<sub>6</sub>, 600 MHz, Me<sub>4</sub>Si, 25 °C): δ ppm= 8.91 (s, 1H, NH), 7.31 (s, 1H, NH), 4.10-  
630 4.07 (m, 2H, OCH<sub>2</sub>CH<sub>3</sub>), 4.07-4.02 (m, 1H, CH), 2.16 (s, 3H, CH<sub>3</sub>), 1.38-1.22 (m, 12H,  
631 (CH<sub>2</sub>)<sub>6</sub>CH<sub>3</sub>), 1.18 (t, *J* = 7.2 Hz, 3H, OCH<sub>2</sub>CH<sub>3</sub>), 0.85 (t, *J* = 7.2 Hz, 3H, (CH<sub>2</sub>)<sub>6</sub>CH<sub>3</sub>); <sup>13</sup>C NMR  
632 (151 MHz, DMSO-*d*<sub>6</sub>, δ ppm): 165.40, 152.79, 148.18, 99.43, 59.00, 50.06, 36.67, 31.20, 28.74,  
633 28.62, 23.66, 22.07, 17.65, 14.17, 13.89; IR (KBr): ν (cm<sup>-1</sup>) 3240, 3113, 2952, 2927, 2859, 1706;  
634 mp (°C): 138-139.

635 **5-Ethoxycarbonyl-6-methyl-4-decyl-3,4-dihydropyrimidin-2(1H)-one (5z)**

636 <sup>1</sup>H NMR (DMSO-*d*<sub>6</sub>, 600 MHz, Me<sub>4</sub>Si, 25 °C): δ ppm= 8.90 (s, 1H, NH), 7.30 (s, 1H, NH), 4.10-  
637 4.03 (m, 2H, OCH<sub>2</sub>CH<sub>3</sub>), 4.03-4.00 (m, 1H, CH), 2.15 (s, 3H, CH<sub>3</sub>), 1.39-1.23 (m, 18H,  
638 (CH<sub>2</sub>)<sub>9</sub>CH<sub>3</sub>), 1.18 (t, *J* = 7.2 Hz, 3H, OCH<sub>2</sub>CH<sub>3</sub>), 0.85 (t, *J* = 7.2 Hz, 3H, (CH<sub>2</sub>)<sub>9</sub>CH<sub>3</sub>); <sup>13</sup>C NMR  
639 (151 MHz, DMSO-*d*<sub>6</sub>, δ ppm): 165.89, 153.23, 148.69, 99.90, 59.45, 50.52, 37.15, 31.75, 29.46,  
640 29.43, 29.42, 29.23, 29.17, 24.12, 22.55, 18.14, 14.66, 14.39; IR (KBr): ν (cm<sup>-1</sup>) 3244, 3122, 2921,  
641 2852, 1730, 1706; mp (°C): 142-143.

642 **5,6-Dimethyl-4-phenyl-3,4-dihydropyrimidin-2(1H)-one (5a')**

643 <sup>1</sup>H NMR (DMSO-*d*<sub>6</sub>, 600 MHz, Me<sub>4</sub>Si, 25 °C): δ ppm = 9.19 (brs, 1H, NH), 7.83 (brs, 1H, NH),  
644 7.34-7.23 (m, 5H, Ar-H), 5.27 (d, *J* = 3.6 Hz, 1H, CH), 2.29 (s, 3H, CH<sub>3</sub>), 2.10 (s, 3H, CH<sub>3</sub>); <sup>13</sup>C  
645 NMR (151 MHz, DMSO-*d*<sub>6</sub>, δ ppm): 194.26, 152.15, 148.11, 144.25, 128.52, 127.34, 126.43,  
646 109.60, 53.85, 30.32, 18.92; IR (KBr): ν (cm<sup>-1</sup>) 3408, 2936, 1745, 1636, 1510, 1458; mp (°C):  
647 239-241.

648 **5,6-Dimethyl-4-(4-nitrophenyl)-3,4-dihydropyrimidin-2(1H)-one (5b')**

649 <sup>1</sup>H NMR (DMSO-*d*<sub>6</sub>, 600 MHz, Me<sub>4</sub>Si, 25 °C): δ ppm = 9.34 (brs, 1H, NH), 8.20 (d, *J* = 8.4 Hz,  
650 2H, Ar-H), 7.98 (brs, 1H, NH), 7.50 (d, *J* = 9.0 Hz, 2H, Ar-H), 5.39 (d, *J* = 3.6 Hz, 1H, CH), 2.31  
651 (s, 3H, CH<sub>3</sub>), 2.18 (s, 3H, CH<sub>3</sub>); <sup>13</sup>C NMR (151 MHz, DMSO-*d*<sub>6</sub>, δ ppm): 193.91, 151.98, 151.56,  
652 149.05, 146.68, 127.67, 123.81, 109.46, 53.16, 30.63, 19.11; IR (KBr): ν (cm<sup>-1</sup>) 3269, 2943, 1716,

653 1670, 1591, 1524; mp (°C): 254-256.

654 **5-Phenyl-1(4-methoxyphenyl)-3[(4-methoxyphenyl)-amino]-1*H*-pyrrol-2(5*H*)-one**

655 <sup>1</sup>H NMR (DMSO-*d*<sub>6</sub>, 600 MHz, Me<sub>4</sub>Si, 25 °C): δ ppm= 7.85 (s, 1H), 7.47 (d, *J* = 9.0 Hz, 2H), 7.26  
656 (d, *J* = 7.2 Hz, 2H), 7.22-7.19 (m, 5H), 6.85 (dd, *J*<sub>1</sub> = 9.6 Hz, *J*<sub>2</sub> = 9.0 Hz, 4H), 6.11 (d, *J* = 2.4 Hz,  
657 1H), 5.92 (d, *J* = 2.4 Hz, 1H), 3.69 (s, 6H); <sup>13</sup>C NMR (151 MHz, DMSO-*d*<sub>6</sub>, δ ppm): 166.31,  
658 156.17, 153.36, 138.26, 135.48, 132.64, 130.18, 128.64, 127.63, 126.80, 123.50, 118.28, 114.31,  
659 113.86, 107.24, 62.81, 55.17, 55.10; mp (°C): 197-199.

660 **12-Phenyl-9,9-dimethyl-8,9,10,12-tetrahydrobenzo[*a*]xanthen-11-one**

661 <sup>1</sup>H NMR (DMSO-*d*<sub>6</sub>, 600 MHz, Me<sub>4</sub>Si, 25 °C): δ ppm= 8.04 (d, *J* = 8.4 Hz, 2H), 7.92-7.90 (m,  
662 2H), 7.50-7.41 (m, 3H), 7.30-7.29 (m, 2H), 7.19-7.16 (m, 2H), 7.06-7.03 (m, 1H), 5.58 (s, 1H),  
663 2.63 (dd, *J*<sub>1</sub> = 17.4 Hz, *J*<sub>2</sub> = 16.2 Hz, 2H), 2.34-2.32 (m, 2H), 1.06 (s, 3H), 0.88 (s, 3H); <sup>13</sup>C NMR  
664 (151 MHz, DMSO-*d*<sub>6</sub>, δ ppm): 196.31, 164.25, 147.64, 145.33, 131.55, 131.11, 129.55, 129.00,  
665 128.60, 128.59, 127.60, 126.66, 125.43, 123.73, 117.77, 117.62, 113.70, 50.60, 40.73, 34.59,  
666 32.36, 29.30, 26.69; mp (°C): 151-153.

667
